# Supplementary material for: Construction of A GBS-Based High-Density Genetic Map and Flower Color-Related Loci Mapping in Grasspea (Lathyrus sativus L.)
Source: MDPI journal article supplement (doi:10.3390/plants11162172), 2022-08-21
Supplement: s1 [file s1]

**Table S1.** Statistic of sequencing data by GBS in male (P1), female (P2), and F<sub>2</sub> individuals of grasspea.

| Sample    | Raw<br>base(bp) | Clean<br>base(bp) | Effective<br>Rate(%) | Error<br>Rate(%) | Q20(%) | Q30(%) | GC<br>Content(%) |
|-----------|-----------------|-------------------|----------------------|------------------|--------|--------|------------------|
| P1_K714   | 2272102272      | 2272102272        | 100                  | 0.03             | 95.57  | 87.47  | 39.19            |
| P2_IF1347 | 2300245632      | 2300245632        | 100                  | 0.03             | 97.68  | 92.56  | 39.45            |
| F2_1      | 2283011136      | 2282965344        | 100                  | 0.03             | 96.62  | 90.4   | 38.9             |
| F2_2      | 2241830304      | 2241780768        | 100                  | 0.03             | 96.03  | 89.01  | 38.55            |
| F2_3      | 2361699360      | 2361649824        | 100                  | 0.04             | 95.94  | 88.85  | 38.58            |
| F2_4      | 2547739296      | 2547679104        | 100                  | 0.03             | 96.91  | 91.1   | 38.73            |
| F2_5      | 2501559360      | 2501508960        | 100                  | 0.03             | 96.31  | 89.7   | 39.08            |
| F2_7      | 2208547872      | 2208508992        | 100                  | 0.04             | 94.59  | 85.88  | 38.56            |
| F2_8      | 2467122912      | 2467068192        | 100                  | 0.04             | 95.13  | 87.05  | 39               |
| F2_10     | 2670241248      | 2670197184        | 100                  | 0.04             | 95.88  | 88.66  | 38.75            |
| F2_11     | 2259451872      | 2259414144        | 100                  | 0.04             | 94.59  | 85.86  | 39.11            |
| F2_12     | 2535976224      | 2535926688        | 100                  | 0.03             | 96.87  | 90.97  | 38.83            |
| F2_13     | 2120599296      | 2120556960        | 100                  | 0.03             | 97.13  | 91.56  | 38.87            |
| F2_14     | 2507743008      | 2507695776        | 100                  | 0.03             | 95.96  | 88.75  | 39.24            |
| F2_15     | 2424794112      | 2424743712        | 100                  | 0.03             | 96.08  | 89.16  | 38.98            |
| F2_16     | 2019251808      | 2019213504        | 100                  | 0.04             | 95.11  | 86.96  | 39.03            |
| F2_17     | 2655298368      | 2655246528        | 100                  | 0.04             | 94.61  | 85.84  | 38.6             |
| F2_18     | 2458438560      | 2458386144        | 100                  | 0.04             | 95.8   | 88.45  | 38.24            |
| F2_19     | 2233653120      | 2233617408        | 100                  | 0.04             | 94.91  | 86.54  | 38.88            |
| F2_20     | 2232893952      | 2232852480        | 100                  | 0.04             | 92.91  | 82.39  | 38.55            |
| F2_22     | 2209794912      | 2209751136        | 100                  | 0.03             | 96.14  | 89.2   | 38.43            |
| F2_23     | 2404800000      | 2404747584        | 100                  | 0.03             | 96.15  | 89.22  | 38.48            |
| F2_25     | 2517990912      | 2517227136        | 99.97                | 0.04             | 93.64  | 84.66  | 37.34            |
| F2_27     | 2259990144      | 2259296352        | 99.97                | 0.04             | 93.66  | 84.69  | 38.61            |
| F2_28     | 2570560128      | 2569817952        | 99.97                | 0.04             | 93.23  | 83.89  | 38.97            |
| F2_30     | 2451600000      | 2450885184        | 99.97                | 0.04             | 94.23  | 85.71  | 37.05            |
| F2_31     | 2140070976      | 2139444288        | 99.97                | 0.04             | 94.11  | 85.55  | 38.06            |
| F2_32     | 1796466816      | 1795940064        | 99.97                | 0.04             | 93.62  | 84.64  | 38.92            |
| F2_33     | 1954895328      | 1954382976        | 99.97                | 0.04             | 92.37  | 82.15  | 39.04            |
| F2_34     | 2050641792      | 2050022592        | 99.97                | 0.04             | 95.23  | 87.7   | 38.75            |
| F2_35     | 2513643552      | 2512878912        | 99.97                | 0.04             | 94     | 85.33  | 38.4             |
| F2_36     | 2216740032      | 2216075328        | 99.97                | 0.04             | 94.6   | 86.58  | 38.67            |
| F2_39     | 2140122528      | 2139492096        | 99.97                | 0.04             | 94.16  | 85.68  | 38.72            |
| F2_40     | 2061904320      | 2061311328        | 99.97                | 0.04             | 93.44  | 84.1   | 36.97            |
| F2_41     | 2130170112      | 2129571936        | 99.97                | 0.04             | 93.15  | 83.56  | 38               |
| F2_42     | 1833982272      | 1833499296        | 99.97                | 0.04             | 92.64  | 82.65  | 39.21            |
| F2_43     | 1947126528      | 1946594880        | 99.97                | 0.04             | 92.59  | 82.55  | 39.02            |
| F2_44     | 2225592576      | 2224957248        | 99.97                | 0.04             | 93.66  | 84.75  | 38.81            |
| F2_45     | 1957419648      | 1956806784        | 99.97                | 0.04             | 94.6   | 86.67  | 38.83            |
| F2_46     | 2173006656      | 2172353472        | 99.97                | 0.04             | 93.76  | 84.94  | 38.5             |
| F2_47     | 2436010272      | 2435293152        | 99.97                | 0.04             | 93.66  | 84.78  | 38.42            |
| F2_49     | 2133630144      | 2132996256        | 99.97                | 0.04             | 95.09  | 87.61  | 38.66            |

|        |            |            |       |      |       |       |       |
|--------|------------|------------|-------|------|-------|-------|-------|
| F2_50  | 2222868672 | 2222187552 | 99.97 | 0.04 | 94.24 | 85.91 | 38.97 |
| F2_51  | 1795826880 | 1795351104 | 99.97 | 0.04 | 91.77 | 81.23 | 38.84 |
| F2_52  | 1841613408 | 1841086080 | 99.97 | 0.04 | 92.69 | 82.91 | 39.22 |
| F2_53  | 1843815744 | 1843262784 | 99.97 | 0.04 | 93.63 | 84.7  | 39    |
| F2_54  | 1676830752 | 1676830752 | 100   | 0.03 | 95.22 | 87.84 | 37.59 |
| F2_55  | 1600013952 | 1599984288 | 100   | 0.03 | 95.33 | 87.97 | 38.45 |
| F2_56  | 1680229440 | 1680196032 | 100   | 0.03 | 94.87 | 87.17 | 38.82 |
| F2_58  | 1917863712 | 1917863712 | 100   | 0.03 | 95.61 | 88.59 | 37.95 |
| F2_59  | 1613314368 | 1613314368 | 100   | 0.03 | 95.47 | 88.38 | 38.17 |
| F2_60  | 1636356096 | 1636328448 | 100   | 0.03 | 95.25 | 87.91 | 38.87 |
| F2_61  | 1416315744 | 1416295296 | 100   | 0.04 | 94.69 | 86.61 | 38.93 |
| F2_62  | 1836969696 | 1836969696 | 100   | 0.03 | 96.2  | 89.82 | 38.64 |
| F2_63  | 1728237312 | 1728211968 | 100   | 0.03 | 95.52 | 88.41 | 38.17 |
| F2_64  | 1763581248 | 1763549568 | 100   | 0.03 | 95.72 | 88.92 | 38.53 |
| F2_65  | 1563604416 | 1563579360 | 100   | 0.03 | 95.62 | 88.62 | 38.51 |
| F2_66  | 1301804352 | 1301804352 | 100   | 0.03 | 95.42 | 87.97 | 36.99 |
| F2_67  | 1677996288 | 1677964896 | 100   | 0.03 | 94.77 | 86.84 | 37.89 |
| F2_69  | 1549139904 | 1549107936 | 100   | 0.03 | 94.84 | 86.85 | 38.93 |
| F2_70  | 1542142080 | 1542142080 | 100   | 0.04 | 94.81 | 86.81 | 38.92 |
| F2_71  | 1555544160 | 1555517376 | 100   | 0.03 | 95.21 | 87.83 | 38.7  |
| F2_72  | 1978591392 | 1978096608 | 99.97 | 0.04 | 94.94 | 87    | 38.8  |
| F2_73  | 1848368160 | 1847922624 | 99.98 | 0.04 | 93.84 | 84.75 | 38.8  |
| F2_74  | 1842972768 | 1842522624 | 99.98 | 0.03 | 96.1  | 89.38 | 38.77 |
| F2_75  | 2059958016 | 2059457760 | 99.98 | 0.04 | 95.26 | 87.63 | 38.41 |
| F2_76  | 1884204576 | 1883739456 | 99.98 | 0.04 | 95.7  | 88.64 | 38.72 |
| F2_78  | 1897443360 | 1896998688 | 99.98 | 0.04 | 95.4  | 87.95 | 38.59 |
| F2_80  | 2231352864 | 2230803360 | 99.98 | 0.04 | 94.75 | 86.51 | 37.23 |
| F2_82  | 2402142624 | 2401584192 | 99.98 | 0.04 | 94.58 | 86.11 | 37.79 |
| F2_83  | 1807746624 | 1807306848 | 99.98 | 0.04 | 94.21 | 85.5  | 38.99 |
| F2_86  | 1676104992 | 1675688256 | 99.98 | 0.04 | 94.14 | 85.34 | 39.11 |
| F2_87  | 1705316544 | 1704895200 | 99.98 | 0.04 | 95.04 | 87.23 | 38.87 |
| F2_89  | 1886926176 | 1886463648 | 99.98 | 0.04 | 95.71 | 88.7  | 38.74 |
| F2_91  | 1863915264 | 1863447840 | 99.97 | 0.04 | 95.06 | 87.3  | 38.45 |
| F2_92  | 1819883520 | 1819434816 | 99.98 | 0.04 | 95    | 87.19 | 38.39 |
| F2_94  | 1676025792 | 1675617696 | 99.98 | 0.03 | 96.07 | 89.47 | 38.56 |
| F2_95  | 1919332512 | 1918859904 | 99.98 | 0.04 | 95.41 | 88.05 | 38.73 |
| F2_96  | 1731451392 | 1731042720 | 99.98 | 0.04 | 93.51 | 84.19 | 38.34 |
| F2_98  | 1620661536 | 1620292896 | 99.98 | 0.04 | 94.19 | 85.49 | 38.84 |
| F2_99  | 1636348320 | 1635952608 | 99.98 | 0.04 | 94.96 | 87.1  | 38.83 |
| F2_100 | 1867213440 | 1866793536 | 99.98 | 0.04 | 93.62 | 84.34 | 39.03 |
| F2_101 | 1784416320 | 1783976256 | 99.98 | 0.03 | 96    | 89.3  | 38.66 |
| F2_103 | 1626507936 | 1626114816 | 99.98 | 0.03 | 96.28 | 89.9  | 38.81 |
| F2_105 | 1856414304 | 1855977984 | 99.98 | 0.04 | 95.08 | 87.24 | 38.96 |
| F2_106 | 1810973952 | 1810529568 | 99.98 | 0.04 | 95.19 | 87.59 | 38.86 |
| F2_108 | 1691731008 | 1691324064 | 99.98 | 0.04 | 94.16 | 85.41 | 38.95 |
| F2_109 | 1482608448 | 1482264000 | 99.98 | 0.04 | 93.59 | 84.23 | 38.34 |

|        |            |            |       |      |       |       |       |
|--------|------------|------------|-------|------|-------|-------|-------|
| F2_110 | 2218140000 | 2217596832 | 99.98 | 0.04 | 94.84 | 86.78 | 37.47 |
| F2_111 | 1700862048 | 1700479584 | 99.98 | 0.04 | 93.96 | 85.03 | 38.87 |
| F2_114 | 1665249984 | 1664884224 | 99.98 | 0.04 | 91.92 | 81.03 | 38.5  |
| F2_115 | 1909200384 | 1908748800 | 99.98 | 0.04 | 95.22 | 87.53 | 38.38 |
| F2_117 | 1833009408 | 1832562432 | 99.98 | 0.04 | 95.24 | 87.61 | 38.5  |
| F2_122 | 2589269760 | 2589217344 | 100   | 0.04 | 95.97 | 88.82 | 38.07 |
| F2_123 | 2231254080 | 2231212608 | 100   | 0.04 | 95.9  | 88.68 | 38.91 |
| F2_124 | 2069445600 | 2069414208 | 100   | 0.04 | 95.56 | 87.94 | 39.16 |
| F2_126 | 2264635296 | 2264587488 | 100   | 0.03 | 96.32 | 89.59 | 38.48 |
| F2_127 | 2369380320 | 2369338272 | 100   | 0.03 | 96.22 | 89.41 | 38.44 |
| F2_128 | 1933696512 | 1933661088 | 100   | 0.04 | 95.9  | 88.69 | 39.14 |
| F2_130 | 1859516928 | 1859482368 | 100   | 0.04 | 94.88 | 86.41 | 39.12 |
| F2_131 | 1852167744 | 1852133184 | 100   | 0.03 | 96.94 | 91.02 | 38.84 |
| F2_133 | 2142859680 | 2142809856 | 100   | 0.03 | 96.15 | 89.22 | 38.57 |
| F2_137 | 1969933824 | 1969454592 | 99.98 | 0.04 | 94.97 | 87.06 | 38.56 |
| F2_138 | 2070793728 | 2070744192 | 100   | 0.03 | 96.57 | 90.27 | 38.99 |
| F2_141 | 2008816704 | 2008778112 | 100   | 0.03 | 96.32 | 89.65 | 38.89 |
| F2_143 | 2148610176 | 2148573888 | 100   | 0.04 | 95.71 | 88.13 | 37.67 |
| F2_144 | 2008632096 | 2008591200 | 100   | 0.04 | 95.4  | 87.51 | 38.81 |
| F2_145 | 2052496800 | 2052461664 | 100   | 0.04 | 95.19 | 87.07 | 39.11 |
| F2_146 | 1799096256 | 1799066880 | 100   | 0.04 | 95.08 | 86.88 | 39.3  |
| F2_147 | 1579562496 | 1579562496 | 100   | 0.03 | 95.63 | 88.89 | 38.59 |
| F2_149 | 1578846528 | 1578826368 | 100   | 0.03 | 95.3  | 88.08 | 38.37 |
| F2_150 | 1724923584 | 1724895360 | 100   | 0.03 | 95.15 | 87.83 | 38.3  |
| F2_151 | 1897329312 | 1897297632 | 100   | 0.03 | 95.91 | 89.44 | 38.3  |
| F2_152 | 1787416128 | 1787384448 | 100   | 0.03 | 95.42 | 88.38 | 38.55 |
| F2_153 | 1742894496 | 1742867424 | 100   | 0.04 | 94.43 | 86.17 | 38.38 |
| F2_156 | 1629970848 | 1629970848 | 100   | 0.03 | 94.67 | 86.75 | 38.8  |
| F2_157 | 1747306944 | 1747306944 | 100   | 0.03 | 95.08 | 87.6  | 38.5  |
| F2_158 | 1698477696 | 1698440256 | 100   | 0.04 | 94.21 | 85.76 | 38.82 |
| F2_159 | 1752586560 | 1752552864 | 100   | 0.03 | 95.88 | 89.32 | 38.48 |
| F2_160 | 1681602048 | 1681602048 | 100   | 0.03 | 96.13 | 89.83 | 38.5  |
| F2_161 | 1663459776 | 1663421184 | 100   | 0.03 | 95.31 | 87.9  | 38.97 |
| F2_162 | 1575136224 | 1575106272 | 100   | 0.03 | 95.21 | 87.92 | 38.7  |
| F2_165 | 1524634560 | 1524634560 | 100   | 0.04 | 94.65 | 86.59 | 38.84 |
| F2_166 | 1470161664 | 1470136320 | 100   | 0.04 | 94.25 | 85.84 | 38.6  |
| F2_167 | 2181214080 | 2181168288 | 100   | 0.03 | 95.35 | 88.06 | 37.69 |
| F2_169 | 2158576128 | 2158054848 | 99.98 | 0.04 | 95.01 | 87.14 | 37.73 |
| F2_170 | 1807229664 | 1807229664 | 100   | 0.04 | 94.57 | 86.5  | 38.67 |
| F2_173 | 1842442560 | 1842008256 | 99.98 | 0.04 | 95.44 | 87.97 | 37.81 |
| F2_174 | 1776898656 | 1776898656 | 100   | 0.04 | 93.16 | 83.58 | 38.38 |
| F2_176 | 1957796352 | 1957769280 | 100   | 0.03 | 95.4  | 88.22 | 37.59 |
| F2_177 | 1852606080 | 1852579584 | 100   | 0.03 | 95.47 | 88.31 | 38.22 |
| F2_178 | 1879891200 | 1879879104 | 100   | 0.03 | 96.59 | 90.1  | 37.55 |
| F2_180 | 1877317632 | 1877305824 | 100   | 0.03 | 96.45 | 89.8  | 39.05 |
| F2_182 | 2289349440 | 2289332160 | 100   | 0.03 | 96.38 | 89.62 | 39    |

|         |            |            |       |      |       |       |       |
|---------|------------|------------|-------|------|-------|-------|-------|
| F2_183  | 2546809056 | 2546790912 | 100   | 0.03 | 97.05 | 91.31 | 38.78 |
| F2_186  | 2175363648 | 2175347808 | 100   | 0.03 | 97.54 | 92.63 | 38.78 |
| F2_188  | 2221193376 | 2221178400 | 100   | 0.03 | 97.18 | 91.64 | 38.38 |
| F2_190  | 2291917248 | 2291898816 | 100   | 0.03 | 97.06 | 91.41 | 38.52 |
| F2_192  | 2055414528 | 2055394368 | 100   | 0.03 | 97.72 | 93.11 | 38.58 |
| F2_194  | 2048434848 | 2048420160 | 100   | 0.03 | 97.31 | 92.05 | 39.05 |
| F2_195  | 2435059872 | 2435043168 | 100   | 0.03 | 96.13 | 89.08 | 38.41 |
| F2_196  | 1690063200 | 1690049088 | 100   | 0.03 | 96.38 | 89.74 | 38.98 |
| F2_197  | 2269705824 | 2269688544 | 100   | 0.03 | 96.97 | 91.14 | 38.73 |
| F2_198  | 1915636320 | 1915180128 | 99.98 | 0.04 | 94.61 | 86.33 | 38.98 |
| F2_199  | 1987848000 | 1987832448 | 100   | 0.03 | 95.86 | 88.54 | 38.95 |
| F2_200  | 2270493216 | 2270479968 | 100   | 0.03 | 97.68 | 92.99 | 38.83 |
| F2_201  | 2277808416 | 2277791136 | 100   | 0.03 | 97.89 | 93.5  | 38.84 |
| F2_202  | 2354699520 | 2354682816 | 100   | 0.03 | 96.97 | 91.06 | 38.98 |
| F2_203  | 2127743424 | 2127729600 | 100   | 0.03 | 97.11 | 91.53 | 38.81 |
| F2_205  | 2274279552 | 2274264288 | 100   | 0.03 | 96.38 | 89.68 | 38.99 |
| F2_207  | 2042512416 | 2042000640 | 99.97 | 0.04 | 95.32 | 87.78 | 38.15 |
| F2_211  | 2397913632 | 2397894048 | 100   | 0.03 | 96.02 | 88.81 | 38.31 |
| Average | 1998502801 | 1998284477 | 99.99 | 0.04 | 95.24 | 87.66 | 38.60 |

---
