# Supplementary material for: Construction of A GBS-Based High-Density Genetic Map and Flower Color-Related Loci Mapping in Grasspea (Lathyrus sativus L.)
Source: MDPI journal article supplement (doi:10.3390/plants11162172), 2022-08-21
Supplement: s1 [file s1]

**Table S2.** Statistic of clean reads, mapped reads, and sequencing depth in male (P1), female (P2), and F<sub>2</sub> individuals of grasspea.

| Sample    | Clean reads | Reads mapped on genome | Mapping rate(%) | Sequencing average depth <sup>a</sup> |
|-----------|-------------|------------------------|-----------------|---------------------------------------|
| P1_K714   | 15778488    | 15617673               | 98.98           | 13.52                                 |
| P2_IF1347 | 15973928    | 15808872               | 98.97           | 13.88                                 |
| F2_1      | 15853926    | 15669916               | 98.84           | 13.62                                 |
| F2_2      | 15567922    | 15377596               | 98.78           | 14.04                                 |
| F2_3      | 16400346    | 16201026               | 98.78           | 14.5                                  |
| F2_4      | 17692216    | 17492857               | 98.87           | 14.6                                  |
| F2_5      | 17371590    | 17154577               | 98.75           | 14.66                                 |
| F2_7      | 15336868    | 15117484               | 98.57           | 13.95                                 |
| F2_8      | 17132418    | 16937131               | 98.86           | 14.54                                 |
| F2_10     | 18543036    | 18321807               | 98.81           | 15.17                                 |
| F2_11     | 15690376    | 15485003               | 98.69           | 13.62                                 |
| F2_12     | 17610602    | 17417301               | 98.9            | 14.69                                 |
| F2_13     | 14726090    | 14568562               | 98.93           | 13.29                                 |
| F2_14     | 17414554    | 17227506               | 98.93           | 14.38                                 |
| F2_15     | 16838498    | 16641396               | 98.83           | 14.35                                 |
| F2_16     | 14022316    | 13852005               | 98.79           | 13.13                                 |
| F2_17     | 18439212    | 18207310               | 98.74           | 15.47                                 |
| F2_18     | 17072126    | 16863106               | 98.78           | 15.12                                 |
| F2_19     | 15511232    | 15325760               | 98.8            | 13.82                                 |
| F2_20     | 15505920    | 15275973               | 98.52           | 14.45                                 |
| F2_22     | 15345494    | 15159877               | 98.79           | 14.09                                 |
| F2_23     | 16699636    | 16508508               | 98.86           | 14.99                                 |
| F2_25     | 17480744    | 17181416               | 98.29           | 16.2                                  |
| F2_27     | 15689558    | 15448373               | 98.46           | 13.88                                 |
| F2_28     | 17845958    | 17558768               | 98.39           | 14.5                                  |
| F2_30     | 17020036    | 16745380               | 98.39           | 16.26                                 |
| F2_31     | 14857252    | 14623388               | 98.43           | 13.96                                 |
| F2_32     | 12471806    | 12274211               | 98.42           | 12.31                                 |
| F2_33     | 13572104    | 13354098               | 98.39           | 12.71                                 |
| F2_34     | 14236268    | 14045420               | 98.66           | 12.95                                 |
| F2_35     | 17450548    | 17185714               | 98.48           | 14.78                                 |
| F2_36     | 15389412    | 15162359               | 98.52           | 13.63                                 |
| F2_39     | 14857584    | 14635624               | 98.51           | 13.39                                 |
| F2_40     | 14314662    | 14081016               | 98.37           | 15.02                                 |
| F2_41     | 14788694    | 14553506               | 98.41           | 14.36                                 |
| F2_42     | 12732634    | 12524207               | 98.36           | 12.42                                 |
| F2_43     | 13518020    | 13306624               | 98.44           | 12.8                                  |
| F2_44     | 15451092    | 15193744               | 98.33           | 13.56                                 |
| F2_45     | 13588936    | 13376189               | 98.43           | 12.61                                 |

|        |          |          |       |       |
|--------|----------|----------|-------|-------|
| F2_46  | 15085788 | 14826367 | 98.28 | 13.6  |
| F2_47  | 16911758 | 16632090 | 98.35 | 14.27 |
| F2_49  | 14812474 | 14598728 | 98.56 | 13.37 |
| F2_50  | 15431858 | 15201135 | 98.5  | 13.43 |
| F2_51  | 12467716 | 12233184 | 98.12 | 12.4  |
| F2_52  | 12785320 | 12581518 | 98.41 | 12.5  |
| F2_53  | 12800436 | 12601461 | 98.45 | 12.47 |
| F2_54  | 11644658 | 11474524 | 98.54 | 13.81 |
| F2_55  | 11111002 | 10957692 | 98.62 | 12.46 |
| F2_56  | 11668028 | 11497865 | 98.54 | 12.41 |
| F2_58  | 13318498 | 13127462 | 98.57 | 14    |
| F2_59  | 11203572 | 11047190 | 98.6  | 12.55 |
| F2_60  | 11363392 | 11204976 | 98.61 | 12.26 |
| F2_61  | 9835384  | 9705870  | 98.68 | 11.7  |
| F2_62  | 12756734 | 12603941 | 98.8  | 12.9  |
| F2_63  | 12001472 | 11843668 | 98.69 | 13.22 |
| F2_64  | 12246872 | 12076117 | 98.61 | 12.76 |
| F2_65  | 10858190 | 10723562 | 98.76 | 12.25 |
| F2_66  | 9040308  | 8922074  | 98.69 | 13.63 |
| F2_67  | 11652534 | 11486583 | 98.58 | 13.36 |
| F2_69  | 10757694 | 10614324 | 98.67 | 12.04 |
| F2_70  | 10709320 | 10576392 | 98.76 | 12.14 |
| F2_71  | 10802204 | 10655076 | 98.64 | 12.21 |
| F2_72  | 13736782 | 13556072 | 98.68 | 13.37 |
| F2_73  | 12832796 | 12658163 | 98.64 | 12.76 |
| F2_74  | 12795296 | 12642321 | 98.8  | 12.86 |
| F2_75  | 14301790 | 14117909 | 98.71 | 13.84 |
| F2_76  | 13081524 | 12918975 | 98.76 | 13.02 |
| F2_78  | 13173602 | 13008761 | 98.75 | 13.18 |
| F2_80  | 15491690 | 15281536 | 98.64 | 15.46 |
| F2_82  | 16677668 | 16448215 | 98.62 | 16.17 |
| F2_83  | 12550742 | 12375062 | 98.6  | 12.91 |
| F2_86  | 11636724 | 11477090 | 98.63 | 12.27 |
| F2_87  | 11839550 | 11680461 | 98.66 | 12.47 |
| F2_89  | 13100442 | 12930203 | 98.7  | 13.02 |
| F2_91  | 12940610 | 12762351 | 98.62 | 13.08 |
| F2_92  | 12634964 | 12457145 | 98.59 | 13.06 |
| F2_94  | 11636234 | 11489329 | 98.74 | 12.38 |
| F2_95  | 13325416 | 13152619 | 98.7  | 13.02 |
| F2_96  | 12021130 | 11842621 | 98.52 | 12.96 |
| F2_98  | 11252034 | 11096809 | 98.62 | 12.38 |
| F2_99  | 11360782 | 11209312 | 98.67 | 12.29 |
| F2_100 | 12963844 | 12778667 | 98.57 | 12.84 |
| F2_101 | 12388724 | 12231449 | 98.73 | 12.8  |
| F2_103 | 11292464 | 11152143 | 98.76 | 12.15 |

---

---

|        |          |          |       |       |
|--------|----------|----------|-------|-------|
| F2_105 | 12888736 | 12729842 | 98.77 | 12.84 |
| F2_106 | 12573122 | 12410099 | 98.7  | 12.81 |
| F2_108 | 11745306 | 11577578 | 98.57 | 12.38 |
| F2_109 | 10293500 | 10138376 | 98.49 | 12.42 |
| F2_110 | 15399978 | 15186142 | 98.61 | 15.5  |
| F2_111 | 11808886 | 11638940 | 98.56 | 12.48 |
| F2_114 | 11561696 | 11375668 | 98.39 | 12.69 |
| F2_115 | 13255200 | 13057345 | 98.51 | 13.22 |
| F2_117 | 12726128 | 12559545 | 98.69 | 13.06 |
| F2_122 | 17980676 | 17756569 | 98.75 | 16    |
| F2_123 | 15494532 | 15315869 | 98.85 | 13.62 |
| F2_124 | 14370932 | 14201670 | 98.82 | 13.12 |
| F2_126 | 15726302 | 15544665 | 98.85 | 14.18 |
| F2_127 | 16453738 | 16262323 | 98.84 | 14.64 |
| F2_128 | 13428202 | 13270453 | 98.83 | 12.82 |
| F2_130 | 12913072 | 12760715 | 98.82 | 12.71 |
| F2_131 | 12862036 | 12718933 | 98.89 | 12.58 |
| F2_133 | 14880624 | 14708380 | 98.84 | 13.88 |
| F2_137 | 13676768 | 13491040 | 98.64 | 13.42 |
| F2_138 | 14380168 | 14221232 | 98.89 | 13.24 |
| F2_141 | 13949848 | 13792350 | 98.87 | 13.08 |
| F2_143 | 14920652 | 14717967 | 98.64 | 14.61 |
| F2_144 | 13948550 | 13786929 | 98.84 | 13.18 |
| F2_145 | 14253206 | 14081716 | 98.8  | 13.29 |
| F2_146 | 12493520 | 12342409 | 98.79 | 12.29 |
| F2_147 | 10969184 | 10807146 | 98.52 | 11.88 |
| F2_149 | 10964072 | 10807327 | 98.57 | 12.27 |
| F2_150 | 11978440 | 11791740 | 98.44 | 12.64 |
| F2_151 | 13175678 | 12996676 | 98.64 | 12.91 |
| F2_152 | 12412392 | 12220160 | 98.45 | 12.55 |
| F2_153 | 12103246 | 11931271 | 98.58 | 12.73 |
| F2_156 | 11319242 | 11163982 | 98.63 | 12.27 |
| F2_157 | 12134076 | 11968809 | 98.64 | 12.57 |
| F2_158 | 11794724 | 11628422 | 98.59 | 12.42 |
| F2_159 | 12170506 | 11974484 | 98.39 | 12.66 |
| F2_160 | 11677792 | 11522751 | 98.67 | 12.34 |
| F2_161 | 11551536 | 11404691 | 98.73 | 12.16 |
| F2_162 | 10938238 | 10783673 | 98.59 | 12.17 |
| F2_165 | 10587740 | 10445791 | 98.66 | 11.93 |
| F2_166 | 10209280 | 10062457 | 98.56 | 12.13 |
| F2_167 | 15147002 | 14935882 | 98.61 | 14.75 |
| F2_169 | 14986492 | 14777299 | 98.6  | 14.97 |
| F2_170 | 12550206 | 12379294 | 98.64 | 12.86 |
| F2_173 | 12791724 | 12615515 | 98.62 | 13.82 |
| F2_174 | 12339574 | 12159747 | 98.54 | 13.32 |

---

|         |          |          |       |       |
|---------|----------|----------|-------|-------|
| F2_176  | 13595620 | 13394254 | 98.52 | 13.9  |
| F2_177  | 12865136 | 12700550 | 98.72 | 13.16 |
| F2_178  | 13054716 | 12905291 | 98.86 | 14.4  |
| F2_180  | 13036846 | 12896064 | 98.92 | 13.1  |
| F2_182  | 15898140 | 15734679 | 98.97 | 14.04 |
| F2_183  | 17686048 | 17496277 | 98.93 | 15.13 |
| F2_186  | 15106582 | 14941902 | 98.91 | 13.72 |
| F2_188  | 15424850 | 15253301 | 98.89 | 14.2  |
| F2_190  | 15915964 | 15739796 | 98.89 | 14.24 |
| F2_192  | 14273572 | 14106360 | 98.83 | 13.28 |
| F2_194  | 14225140 | 14069665 | 98.91 | 13.49 |
| F2_195  | 16910022 | 16720497 | 98.88 | 15.24 |
| F2_196  | 11736452 | 11607345 | 98.9  | 12.47 |
| F2_197  | 15761726 | 15590602 | 98.91 | 14.23 |
| F2_198  | 13299862 | 13117734 | 98.63 | 12.93 |
| F2_199  | 13804392 | 13642907 | 98.83 | 13.39 |
| F2_200  | 15767222 | 15599509 | 98.94 | 14.09 |
| F2_201  | 15817994 | 15659886 | 99    | 14.28 |
| F2_202  | 16351964 | 16181096 | 98.96 | 14.28 |
| F2_203  | 14775900 | 14619221 | 98.94 | 13.66 |
| F2_205  | 15793502 | 15629433 | 98.96 | 14.3  |
| F2_207  | 14180560 | 13990381 | 98.66 | 14.1  |
| F2_211  | 16652042 | 16465299 | 98.88 | 15.2  |
| F2_214  | 16116666 | 15910049 | 98.72 | 15.04 |
| F2_215  | 13124670 | 12974673 | 98.86 | 12.41 |
| Average | 13876976 | 13694227 | 98.68 | 13.45 |

a: The totals of sequencing bases aligned to the 'Rbp' genome were divided by total genome bases in grasspea.
