# Supplementary material for: Construction of A GBS-Based High-Density Genetic Map and Flower Color-Related Loci Mapping in Grasspea (Lathyrus sativus L.)
Source: MDPI journal article supplement (doi:10.3390/plants11162172), 2022-08-21
Supplement: s1 [file s1]

**Table S3.** Statistic of homozygous SNP, heterozygous SNP, and Homozygous SNP rate in male (P1), female (P2), and F<sub>2</sub> individuals of grasspea.

| Sample    | Total  | Homozygous<br>SNP | Heterozygous<br>SNP | Homozygous<br>SNP rate (%) |
|-----------|--------|-------------------|---------------------|----------------------------|
| P1_K714   | 551846 | 215557            | 336289              | 39.06                      |
| P2_IF1347 | 522270 | 319583            | 202687              | 61.19                      |
| F2_1      | 619922 | 274812            | 345110              | 44.33                      |
| F2_2      | 612207 | 288855            | 323352              | 47.18                      |
| F2_3      | 568896 | 276875            | 292021              | 48.67                      |
| F2_4      | 629634 | 331498            | 298136              | 52.65                      |
| F2_5      | 631052 | 324134            | 306918              | 51.36                      |
| F2_7      | 564857 | 270953            | 293904              | 47.97                      |
| F2_8      | 572366 | 255506            | 316860              | 44.64                      |
| F2_10     | 691193 | 346219            | 344974              | 50.09                      |
| F2_11     | 586184 | 264032            | 322152              | 45.04                      |
| F2_12     | 623978 | 317551            | 306427              | 50.89                      |
| F2_13     | 541591 | 261234            | 280357              | 48.23                      |
| F2_14     | 605938 | 275225            | 330713              | 45.42                      |
| F2_15     | 635364 | 323198            | 312166              | 50.87                      |
| F2_16     | 553633 | 267374            | 286259              | 48.29                      |
| F2_17     | 613478 | 309594            | 303884              | 50.47                      |
| F2_18     | 617410 | 308129            | 309281              | 49.91                      |
| F2_19     | 608151 | 276606            | 331545              | 45.48                      |
| F2_20     | 545225 | 296061            | 249164              | 54.3                       |
| F2_22     | 617833 | 297336            | 320497              | 48.13                      |
| F2_23     | 621798 | 309875            | 311923              | 49.84                      |
| F2_25     | 557347 | 277504            | 279843              | 49.79                      |
| F2_27     | 566418 | 285346            | 281072              | 50.38                      |
| F2_28     | 658585 | 306353            | 352232              | 46.52                      |
| F2_30     | 568140 | 271751            | 296389              | 47.83                      |
| F2_31     | 554684 | 274118            | 280566              | 49.42                      |
| F2_32     | 497735 | 222014            | 275721              | 44.6                       |
| F2_33     | 504255 | 223464            | 280791              | 44.32                      |
| F2_34     | 589437 | 262058            | 327379              | 44.46                      |
| F2_35     | 624058 | 280210            | 343848              | 44.9                       |
| F2_36     | 598631 | 284945            | 313686              | 47.6                       |
| F2_39     | 573161 | 274607            | 298554              | 47.91                      |
| F2_40     | 474121 | 211889            | 262232              | 44.69                      |
| F2_41     | 522262 | 249655            | 272607              | 47.8                       |
| F2_42     | 460739 | 209300            | 251439              | 45.43                      |
| F2_43     | 487210 | 206077            | 281133              | 42.3                       |
| F2_44     | 565612 | 278684            | 286928              | 49.27                      |
| F2_45     | 540137 | 241758            | 298379              | 44.76                      |
| F2_46     | 606803 | 264395            | 342408              | 43.57                      |

---

|        |        |        |        |       |
|--------|--------|--------|--------|-------|
| F2_47  | 621982 | 277120 | 344862 | 44.55 |
| F2_49  | 573915 | 275223 | 298692 | 47.96 |
| F2_50  | 572768 | 264545 | 308223 | 46.19 |
| F2_51  | 491037 | 211280 | 279757 | 43.03 |
| F2_52  | 459361 | 218031 | 241330 | 47.46 |
| F2_53  | 481407 | 213292 | 268115 | 44.31 |
| F2_54  | 443276 | 196191 | 247085 | 44.26 |
| F2_55  | 431622 | 211067 | 220555 | 48.9  |
| F2_56  | 499019 | 215168 | 283851 | 43.12 |
| F2_58  | 502996 | 242352 | 260644 | 48.18 |
| F2_59  | 468190 | 210819 | 257371 | 45.03 |
| F2_60  | 472770 | 204634 | 268136 | 43.28 |
| F2_61  | 381360 | 161397 | 219963 | 42.32 |
| F2_62  | 501536 | 247780 | 253756 | 49.4  |
| F2_63  | 481818 | 238449 | 243369 | 49.49 |
| F2_64  | 491776 | 222634 | 269142 | 45.27 |
| F2_65  | 411158 | 200158 | 211000 | 48.68 |
| F2_66  | 332676 | 145007 | 187669 | 43.59 |
| F2_67  | 454881 | 223680 | 231201 | 49.17 |
| F2_69  | 450389 | 202005 | 248384 | 44.85 |
| F2_70  | 414846 | 194401 | 220445 | 46.86 |
| F2_71  | 409800 | 201438 | 208362 | 49.16 |
| F2_72  | 495664 | 245286 | 250378 | 49.49 |
| F2_73  | 486182 | 208102 | 278080 | 42.8  |
| F2_74  | 514582 | 245943 | 268639 | 47.79 |
| F2_75  | 514913 | 288072 | 226841 | 55.95 |
| F2_76  | 500149 | 242572 | 257577 | 48.5  |
| F2_78  | 478864 | 241040 | 237824 | 50.34 |
| F2_80  | 517183 | 263797 | 253386 | 51.01 |
| F2_82  | 501133 | 262584 | 238549 | 52.4  |
| F2_83  | 455663 | 231454 | 224209 | 50.79 |
| F2_86  | 463700 | 197559 | 266141 | 42.6  |
| F2_87  | 443590 | 219229 | 224361 | 49.42 |
| F2_89  | 470035 | 234412 | 235623 | 49.87 |
| F2_91  | 487363 | 215539 | 271824 | 44.23 |
| F2_92  | 467808 | 225156 | 242652 | 48.13 |
| F2_94  | 448969 | 200801 | 248168 | 44.72 |
| F2_95  | 523796 | 222126 | 301670 | 42.41 |
| F2_96  | 436651 | 204252 | 232399 | 46.78 |
| F2_98  | 405463 | 202061 | 203402 | 49.83 |
| F2_99  | 428753 | 191270 | 237483 | 44.61 |
| F2_100 | 476096 | 204083 | 272013 | 42.87 |
| F2_101 | 496764 | 235367 | 261397 | 47.38 |
| F2_103 | 438879 | 194445 | 244434 | 44.3  |
| F2_105 | 487147 | 214631 | 272516 | 44.06 |

---

---

|        |        |        |        |       |
|--------|--------|--------|--------|-------|
| F2_106 | 433158 | 224184 | 208974 | 51.76 |
| F2_108 | 474452 | 199209 | 275243 | 41.99 |
| F2_109 | 387484 | 169037 | 218447 | 43.62 |
| F2_110 | 478680 | 233065 | 245615 | 48.69 |
| F2_111 | 433705 | 183034 | 250671 | 42.2  |
| F2_114 | 422571 | 182300 | 240271 | 43.14 |
| F2_115 | 483708 | 217987 | 265721 | 45.07 |
| F2_117 | 480494 | 235214 | 245280 | 48.95 |
| F2_122 | 637009 | 312912 | 324097 | 49.12 |
| F2_123 | 599514 | 264531 | 334983 | 44.12 |
| F2_124 | 559695 | 215015 | 344680 | 38.42 |
| F2_126 | 559969 | 267641 | 292328 | 47.8  |
| F2_127 | 555657 | 297626 | 258031 | 53.56 |
| F2_128 | 519574 | 258367 | 261207 | 49.73 |
| F2_130 | 492377 | 235020 | 257357 | 47.73 |
| F2_131 | 487616 | 204779 | 282837 | 42    |
| F2_133 | 549222 | 257725 | 291497 | 46.93 |
| F2_137 | 509230 | 270216 | 239014 | 53.06 |
| F2_138 | 561488 | 244817 | 316671 | 43.6  |
| F2_141 | 589719 | 243867 | 345852 | 41.35 |
| F2_143 | 531715 | 253942 | 277773 | 47.76 |
| F2_144 | 506446 | 242342 | 264104 | 47.85 |
| F2_145 | 524600 | 230006 | 294594 | 43.84 |
| F2_146 | 501840 | 202135 | 299705 | 40.28 |
| F2_147 | 431320 | 185134 | 246186 | 42.92 |
| F2_149 | 434280 | 216744 | 217536 | 49.91 |
| F2_150 | 492569 | 239111 | 253458 | 48.54 |
| F2_151 | 498508 | 244277 | 254231 | 49    |
| F2_152 | 471080 | 204801 | 266279 | 43.47 |
| F2_153 | 474406 | 184146 | 290260 | 38.82 |
| F2_156 | 436936 | 214510 | 222426 | 49.09 |
| F2_157 | 486506 | 209716 | 276790 | 43.11 |
| F2_158 | 453265 | 191573 | 261692 | 42.27 |
| F2_159 | 494293 | 237695 | 256598 | 48.09 |
| F2_160 | 498457 | 214257 | 284200 | 42.98 |
| F2_161 | 469192 | 211939 | 257253 | 45.17 |
| F2_162 | 436533 | 214185 | 222348 | 49.07 |
| F2_165 | 443399 | 193882 | 249517 | 43.73 |
| F2_166 | 402433 | 195435 | 206998 | 48.56 |
| F2_167 | 560527 | 263488 | 297039 | 47.01 |
| F2_169 | 517031 | 240320 | 276711 | 46.48 |
| F2_170 | 462035 | 224316 | 237719 | 48.55 |
| F2_173 | 469190 | 217482 | 251708 | 46.35 |
| F2_174 | 459682 | 238252 | 221430 | 51.83 |
| F2_176 | 516728 | 234633 | 282095 | 45.41 |

---

|         |        |        |        |       |
|---------|--------|--------|--------|-------|
| F2_177  | 457440 | 214485 | 242955 | 46.89 |
| F2_178  | 459694 | 225748 | 233946 | 49.11 |
| F2_180  | 493056 | 244714 | 248342 | 49.63 |
| F2_182  | 598527 | 267392 | 331135 | 44.68 |
| F2_183  | 634051 | 333698 | 300353 | 52.63 |
| F2_186  | 627011 | 281552 | 345459 | 44.9  |
| F2_188  | 596454 | 260503 | 335951 | 43.68 |
| F2_190  | 649376 | 284887 | 364489 | 43.87 |
| F2_192  | 616443 | 254776 | 361667 | 41.33 |
| F2_194  | 539860 | 256200 | 283660 | 47.46 |
| F2_195  | 590534 | 297256 | 293278 | 50.34 |
| F2_196  | 475121 | 221196 | 253925 | 46.56 |
| F2_197  | 591535 | 276344 | 315191 | 46.72 |
| F2_198  | 457232 | 219278 | 237954 | 47.96 |
| F2_199  | 558771 | 287131 | 271640 | 51.39 |
| F2_200  | 591856 | 310566 | 281290 | 52.47 |
| F2_201  | 588427 | 323024 | 265403 | 54.9  |
| F2_202  | 625132 | 304671 | 320461 | 48.74 |
| F2_203  | 567418 | 250983 | 316435 | 44.23 |
| F2_205  | 584741 | 274608 | 310133 | 46.96 |
| F2_207  | 492117 | 256735 | 235382 | 52.17 |
| F2_211  | 565473 | 291620 | 273853 | 51.57 |
| F2_214  | 612745 | 294095 | 318650 | 48    |
| F2_215  | 515650 | 205865 | 309785 | 39.92 |
| Average | 519799 | 244539 | 275260 | 46.97 |
