# Supplementary figures and images for: Construction of A GBS-Based High-Density Genetic Map and Flower Color-Related Loci Mapping in Grasspea (Lathyrus sativus L.)
Source: MDPI journal article supplement (doi:10.3390/plants11162172), 2022-08-21

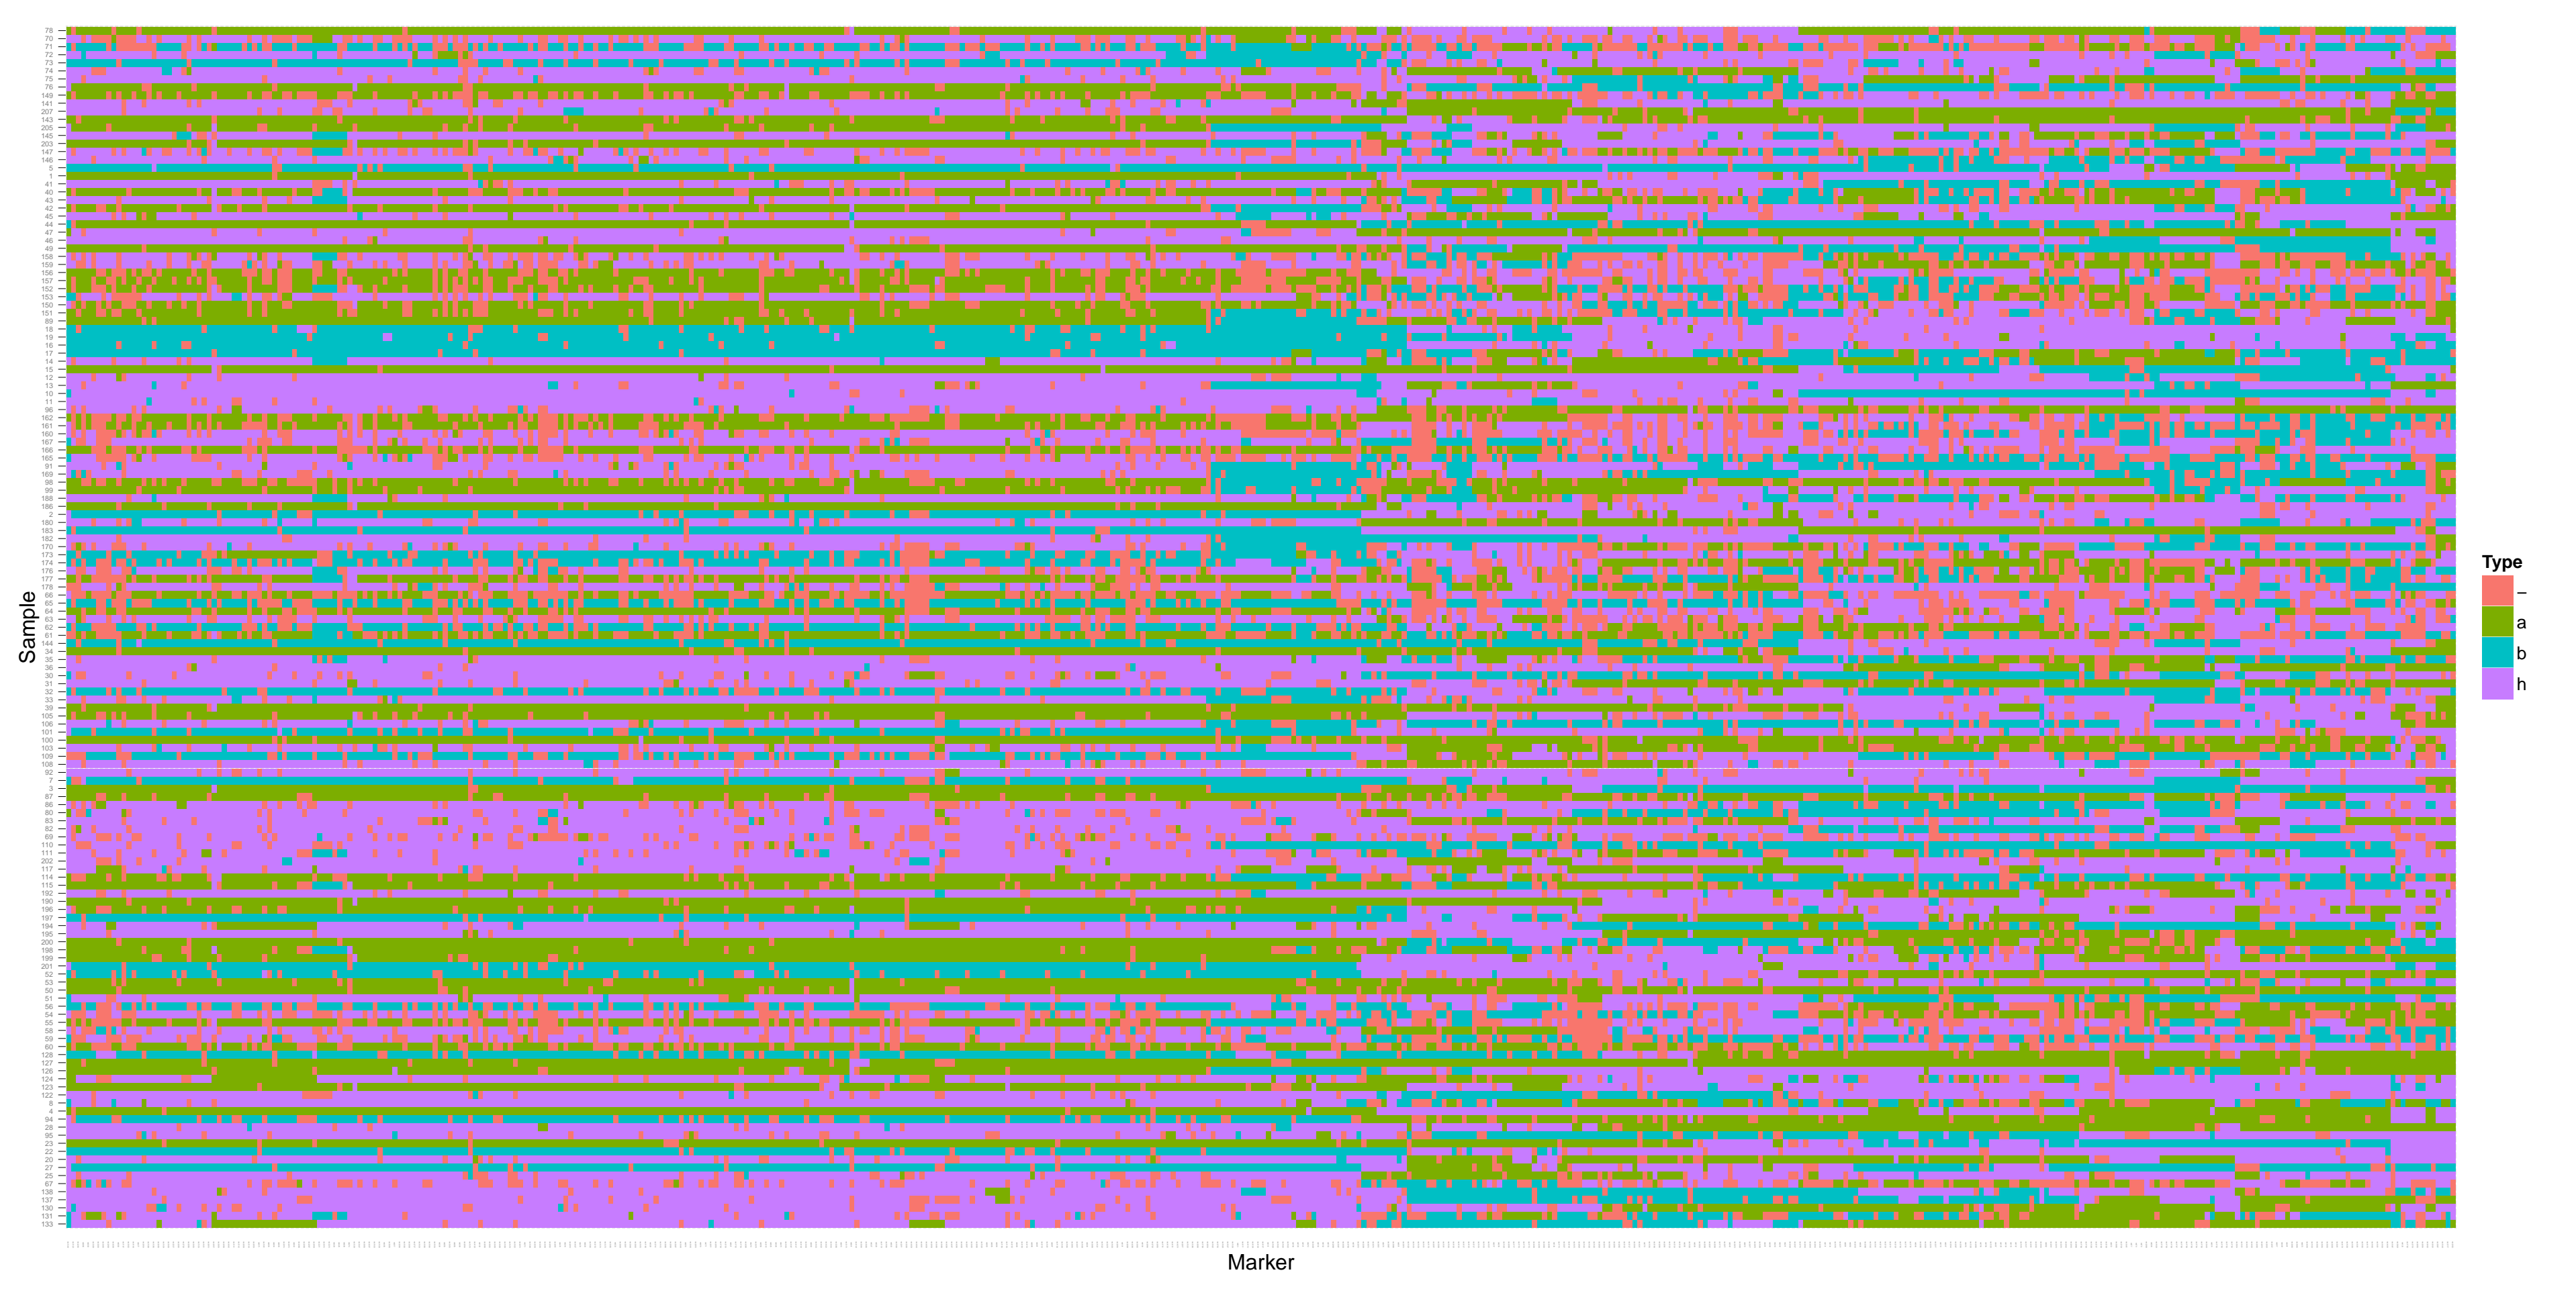

Supplement: s1 [file s1]

lg04

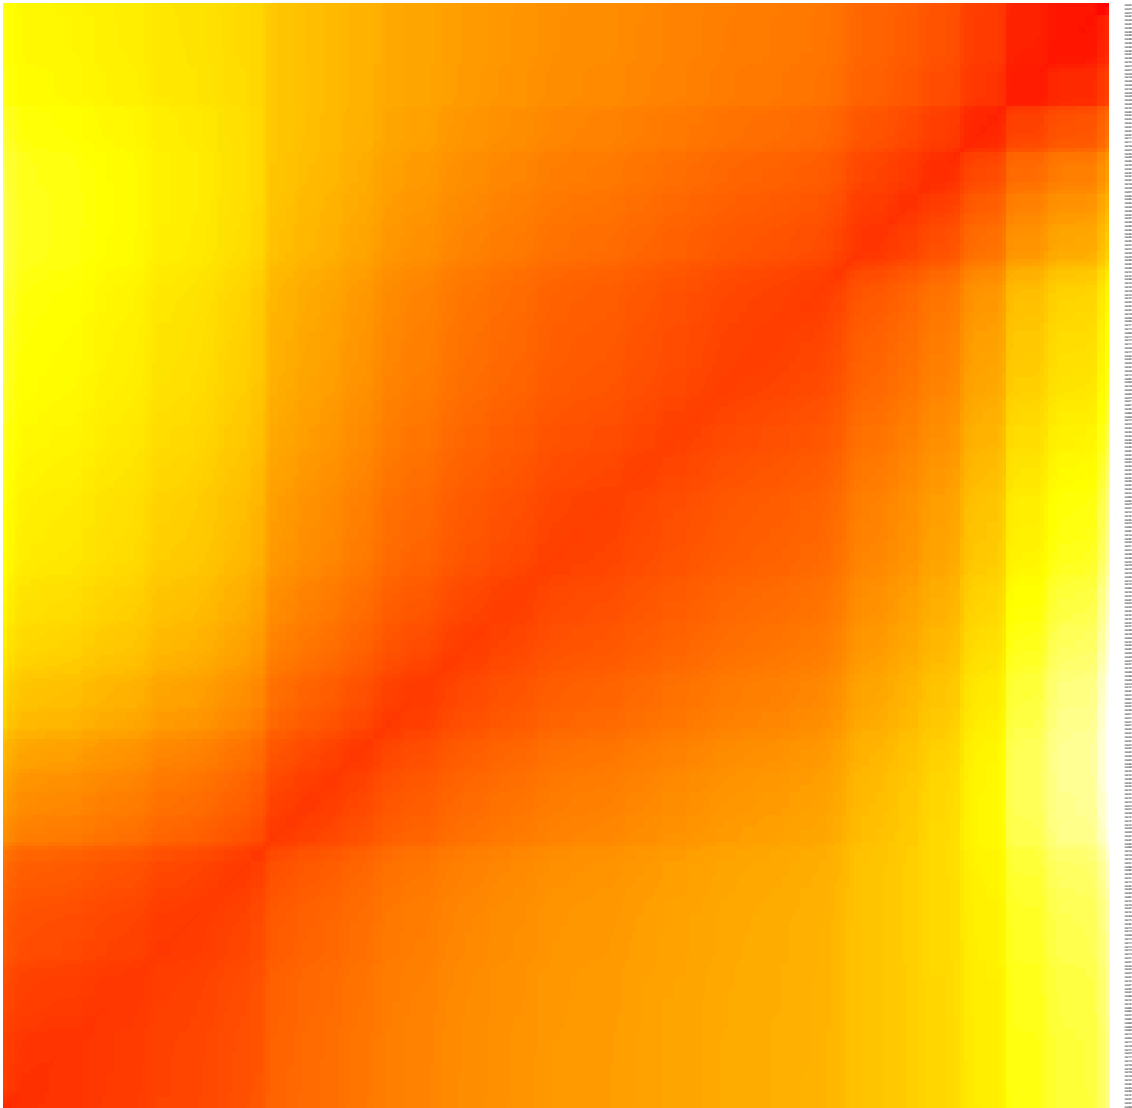

Supplement: s1 [file s1]

lg03

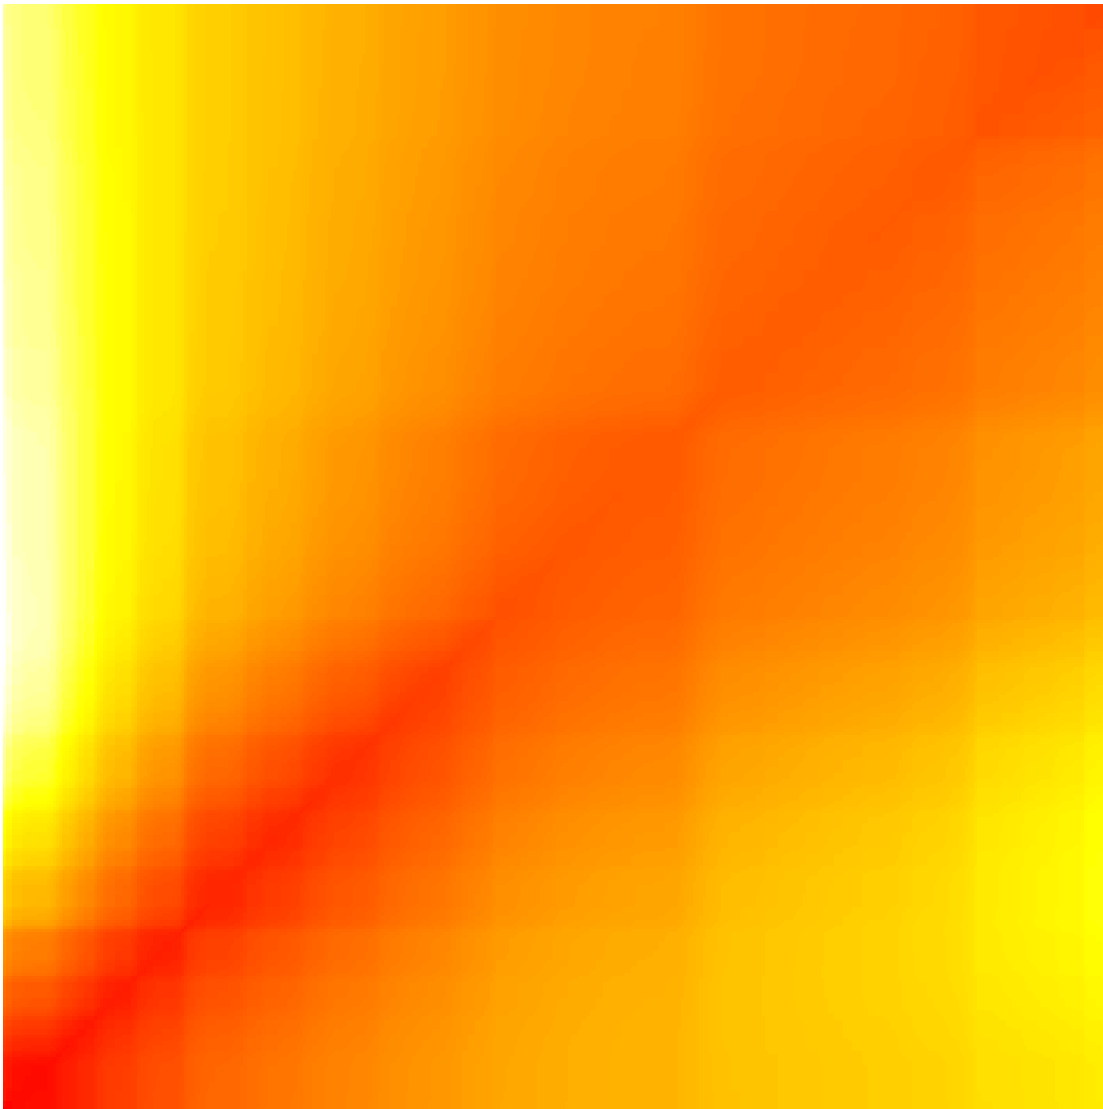

Supplement: s1 [file s1]

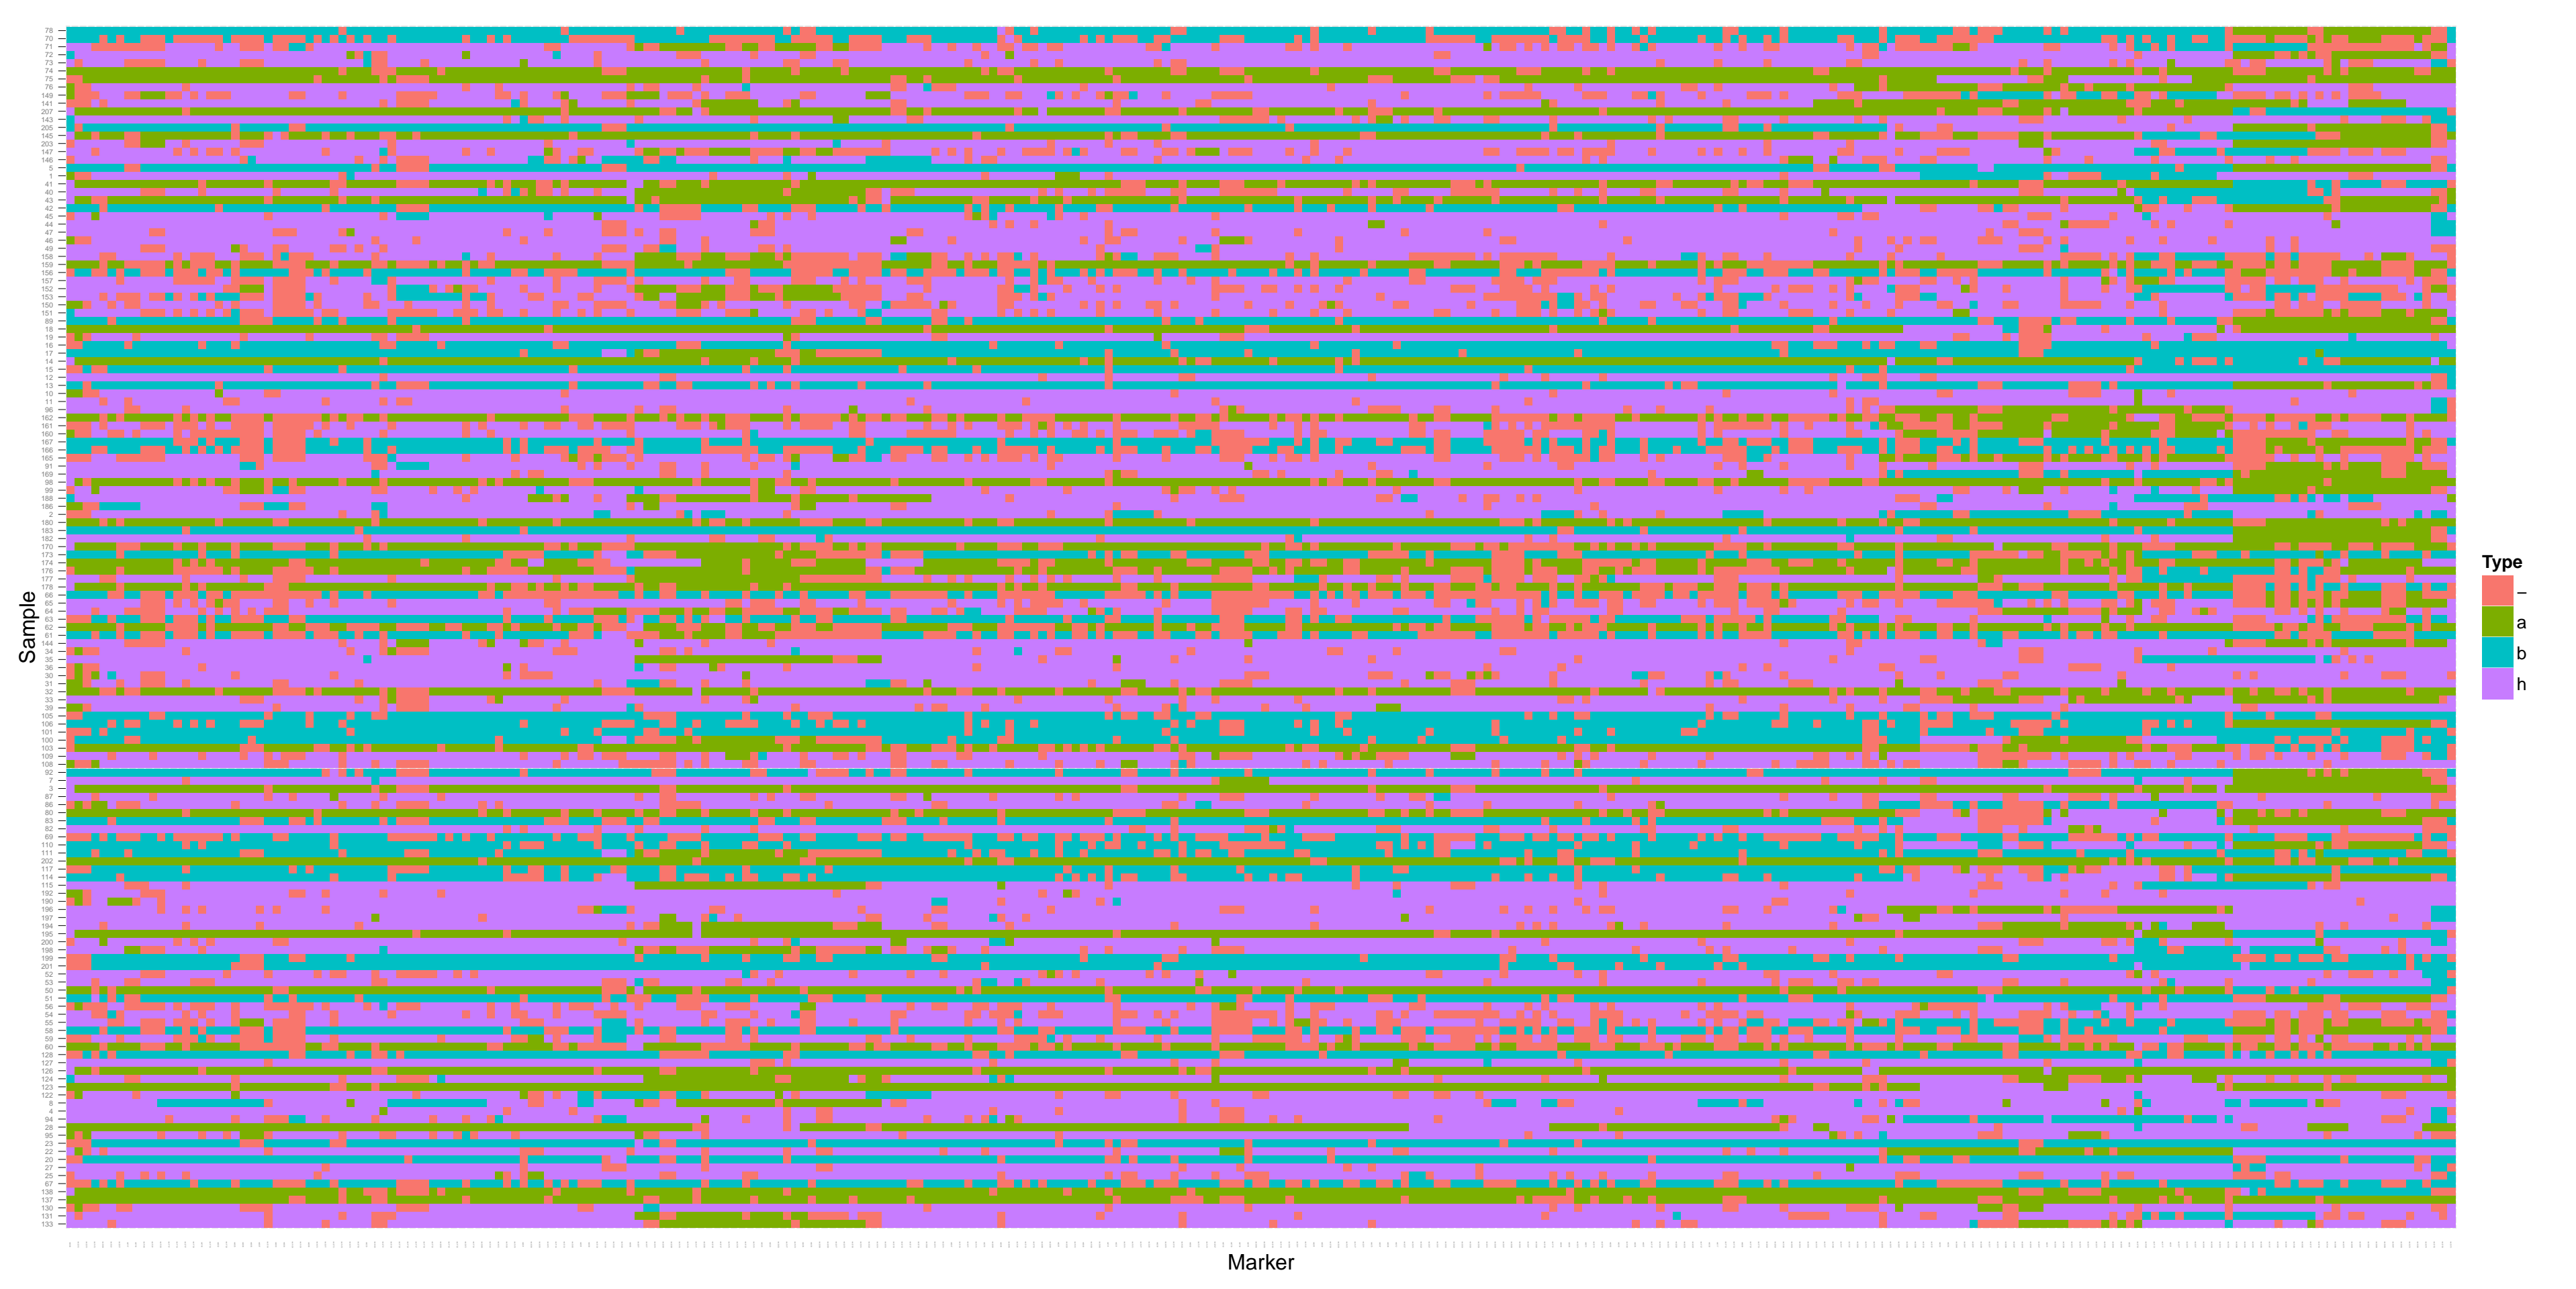

Supplement: s1 [file s1]

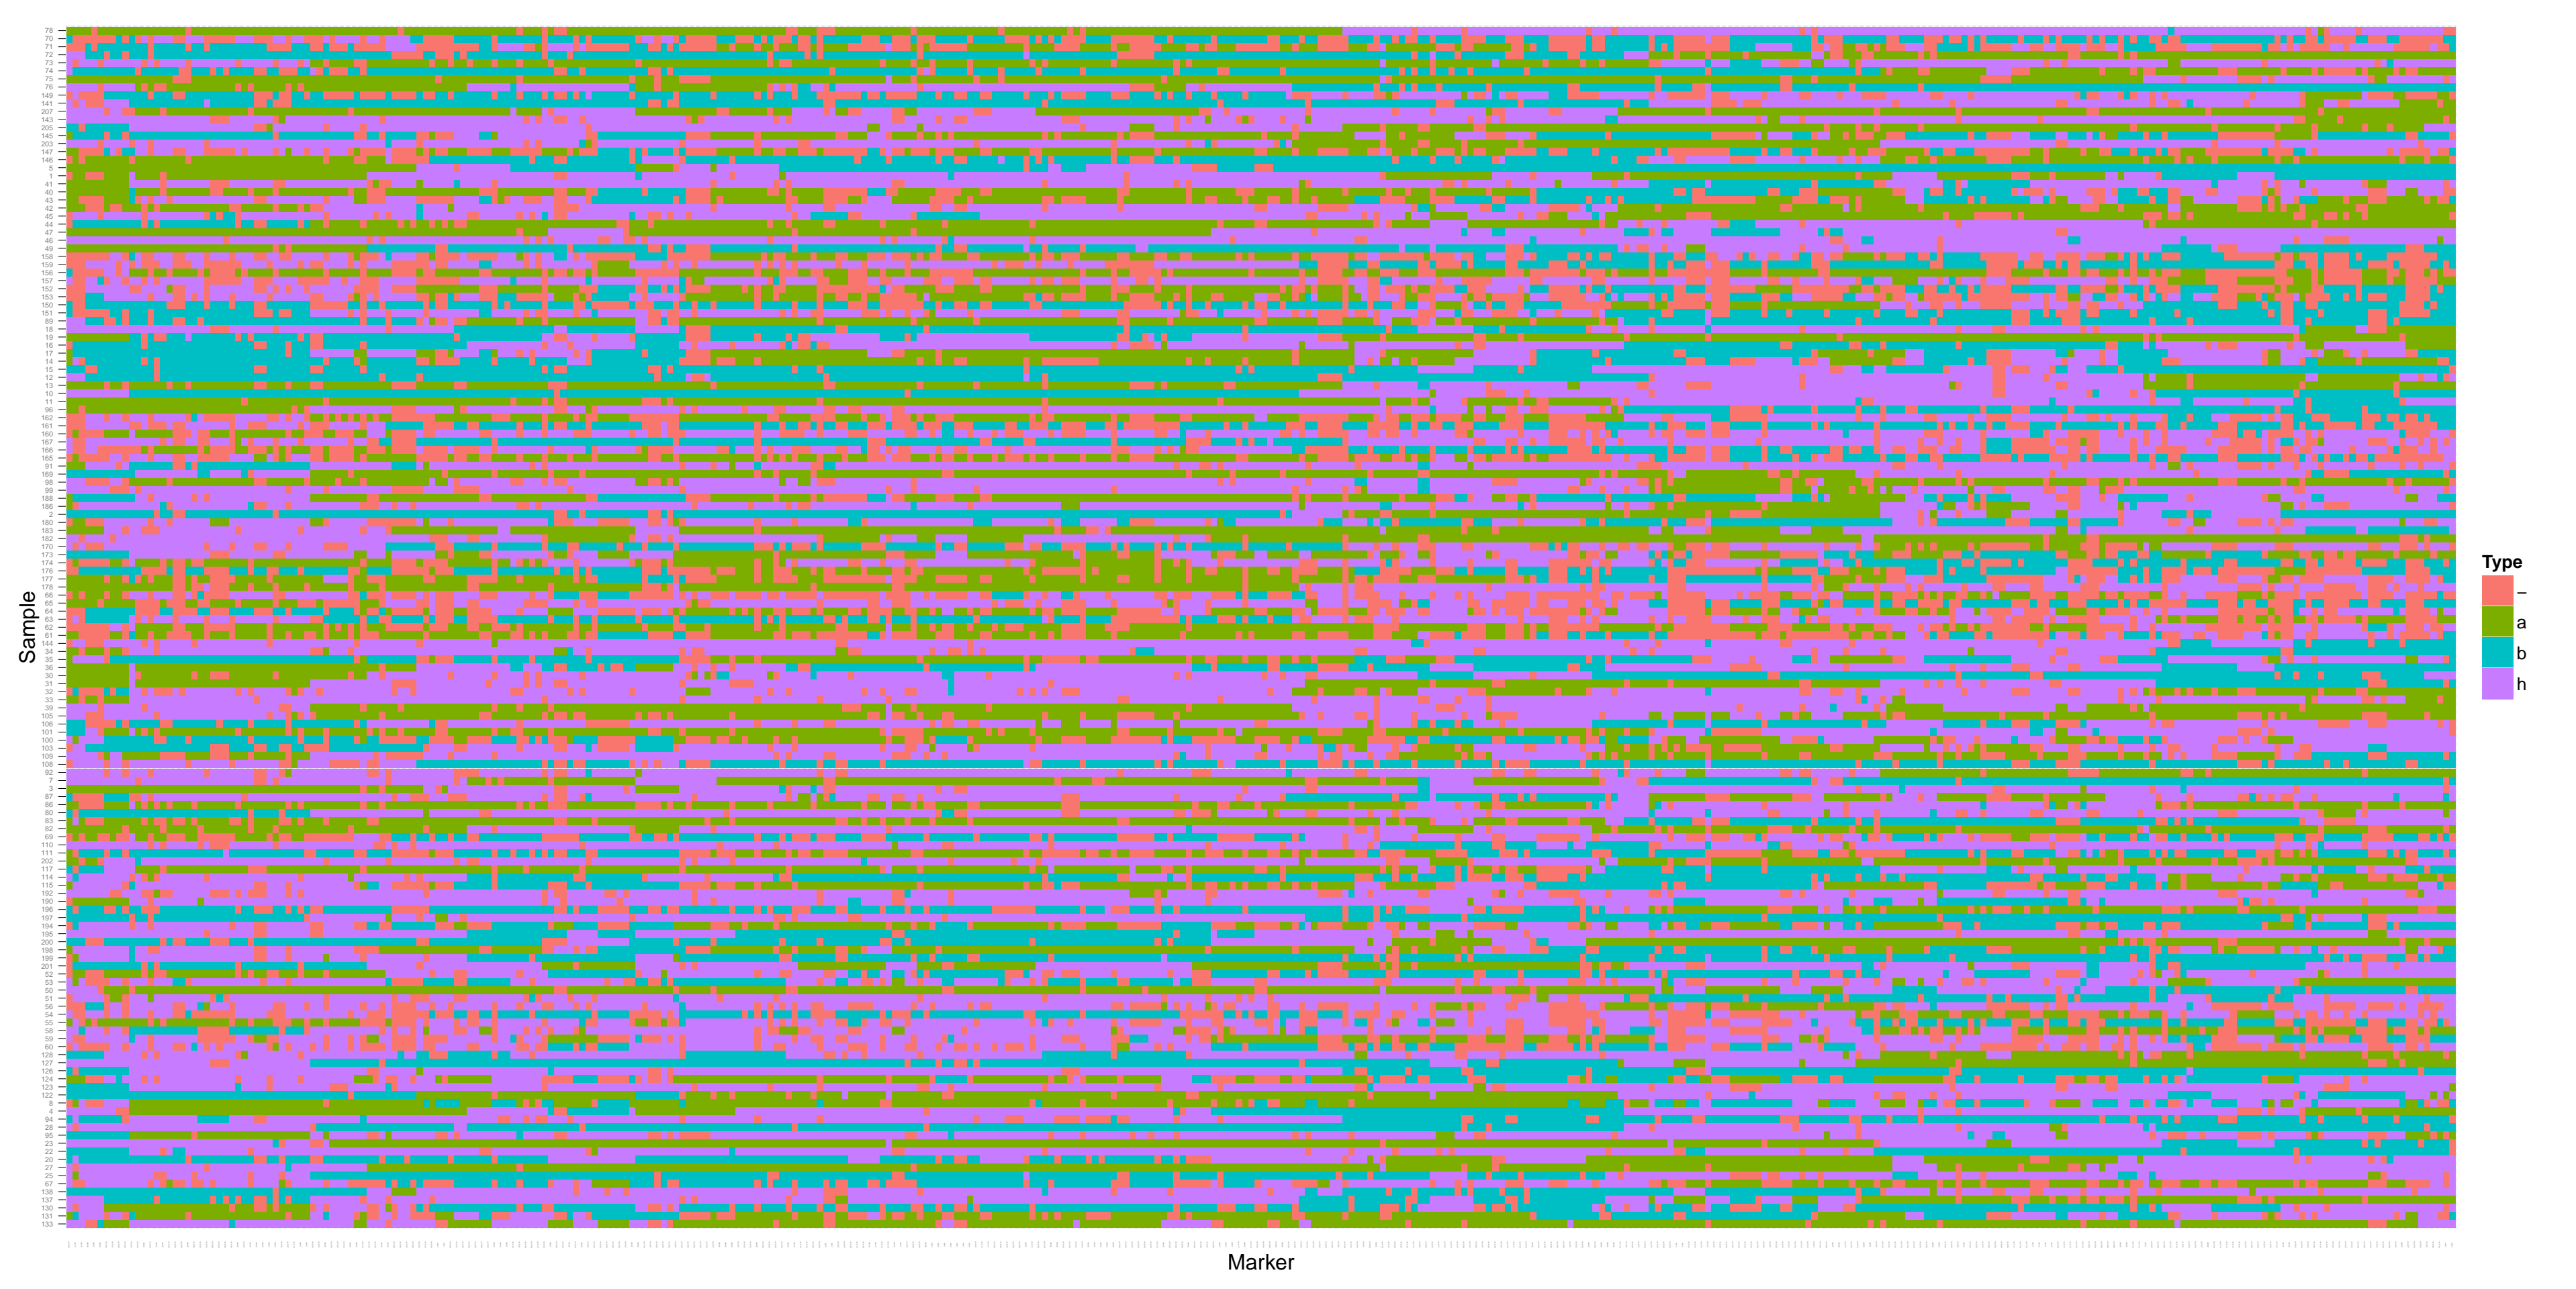

Supplement: s1 [file s1]

lg02

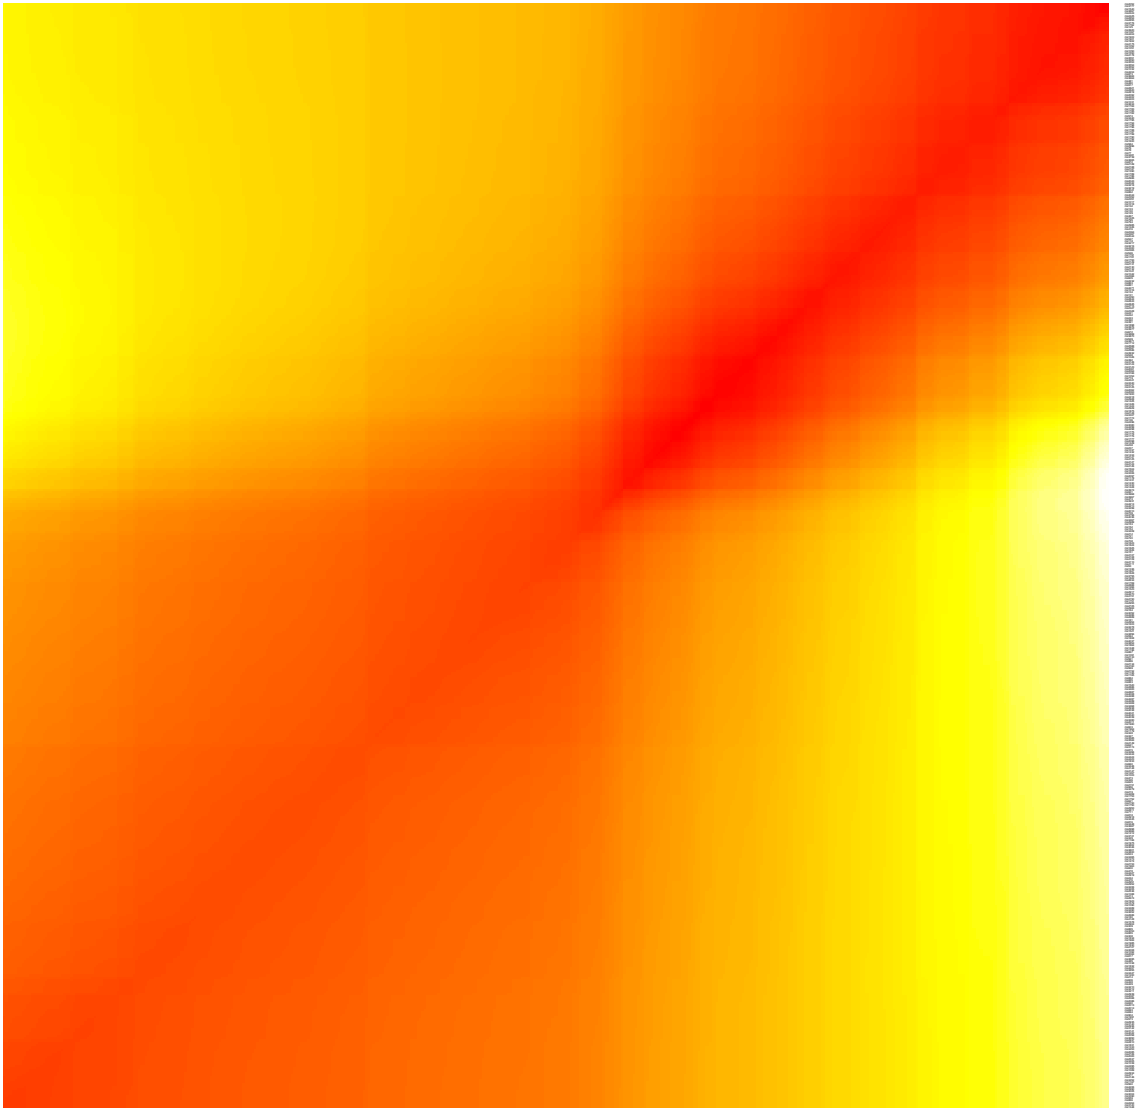

Supplement: s1 [file s1]

lg01

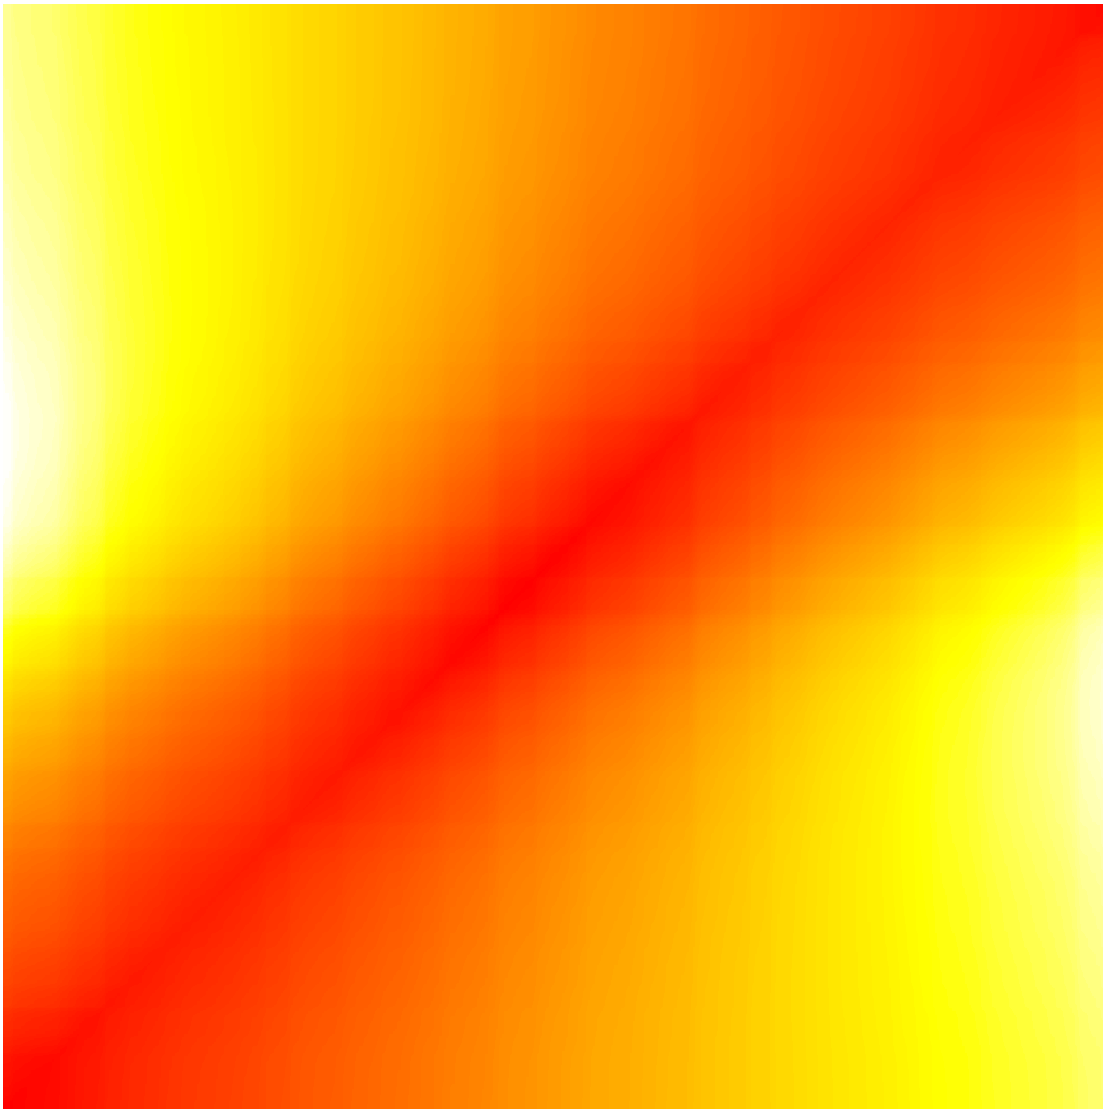

Supplement: s1 [file s1]

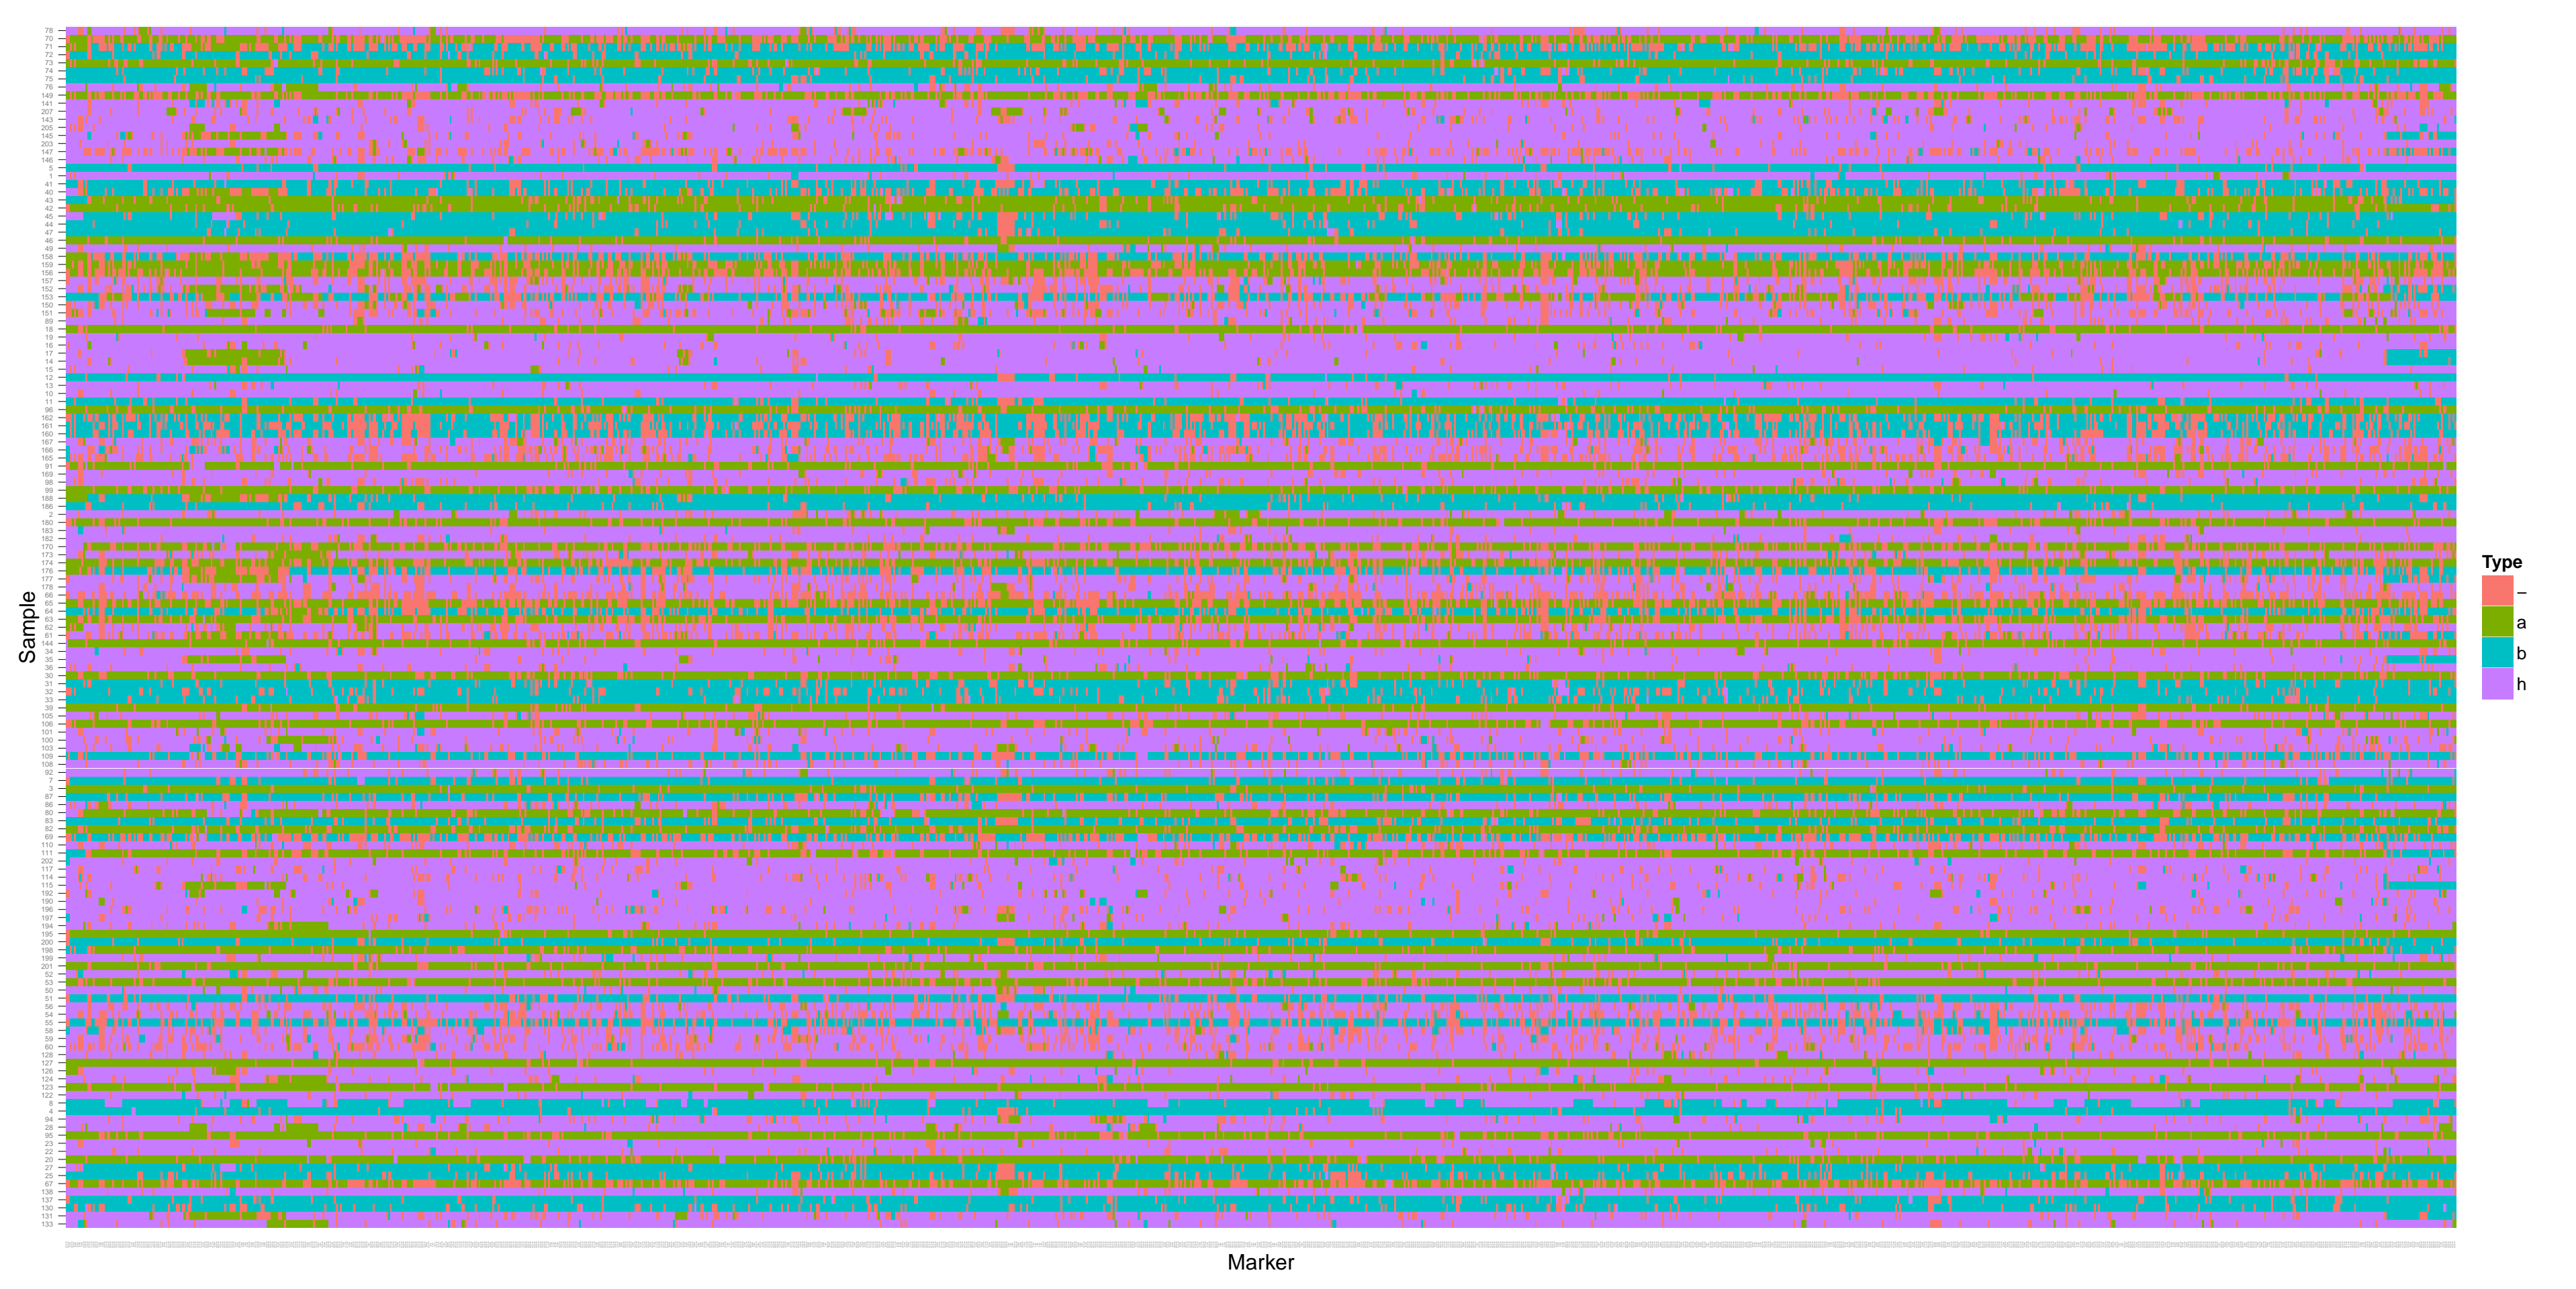

Supplement: s1 [file s1]

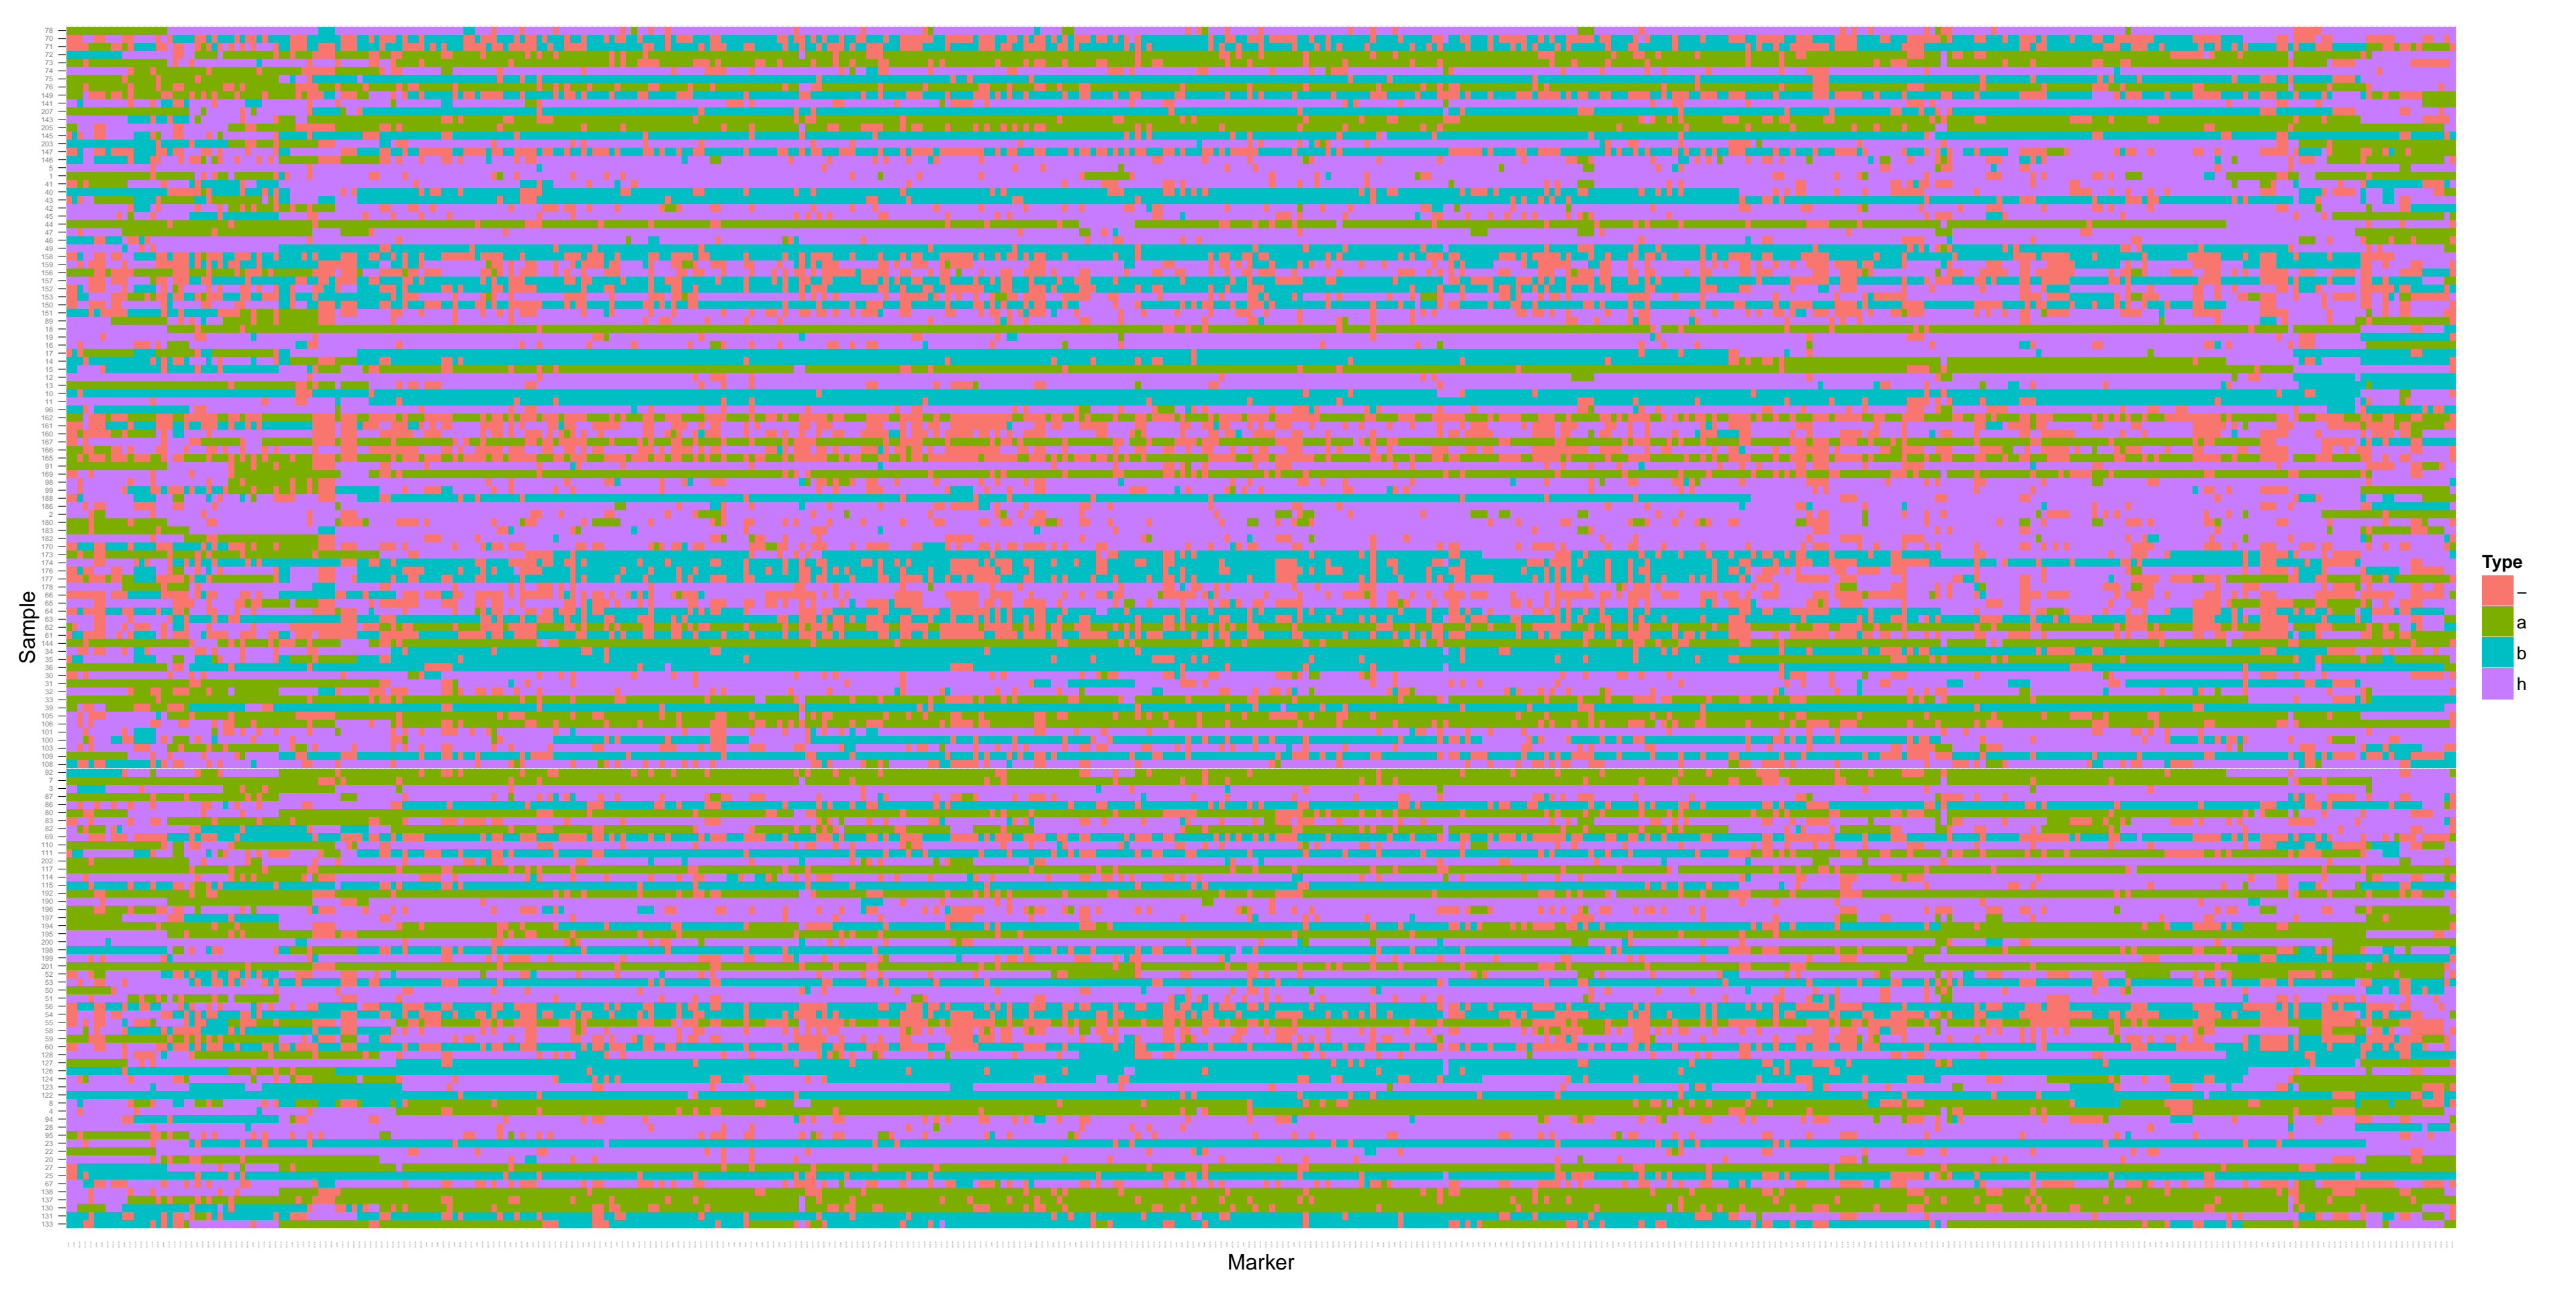

Supplement: s1 [file s1]

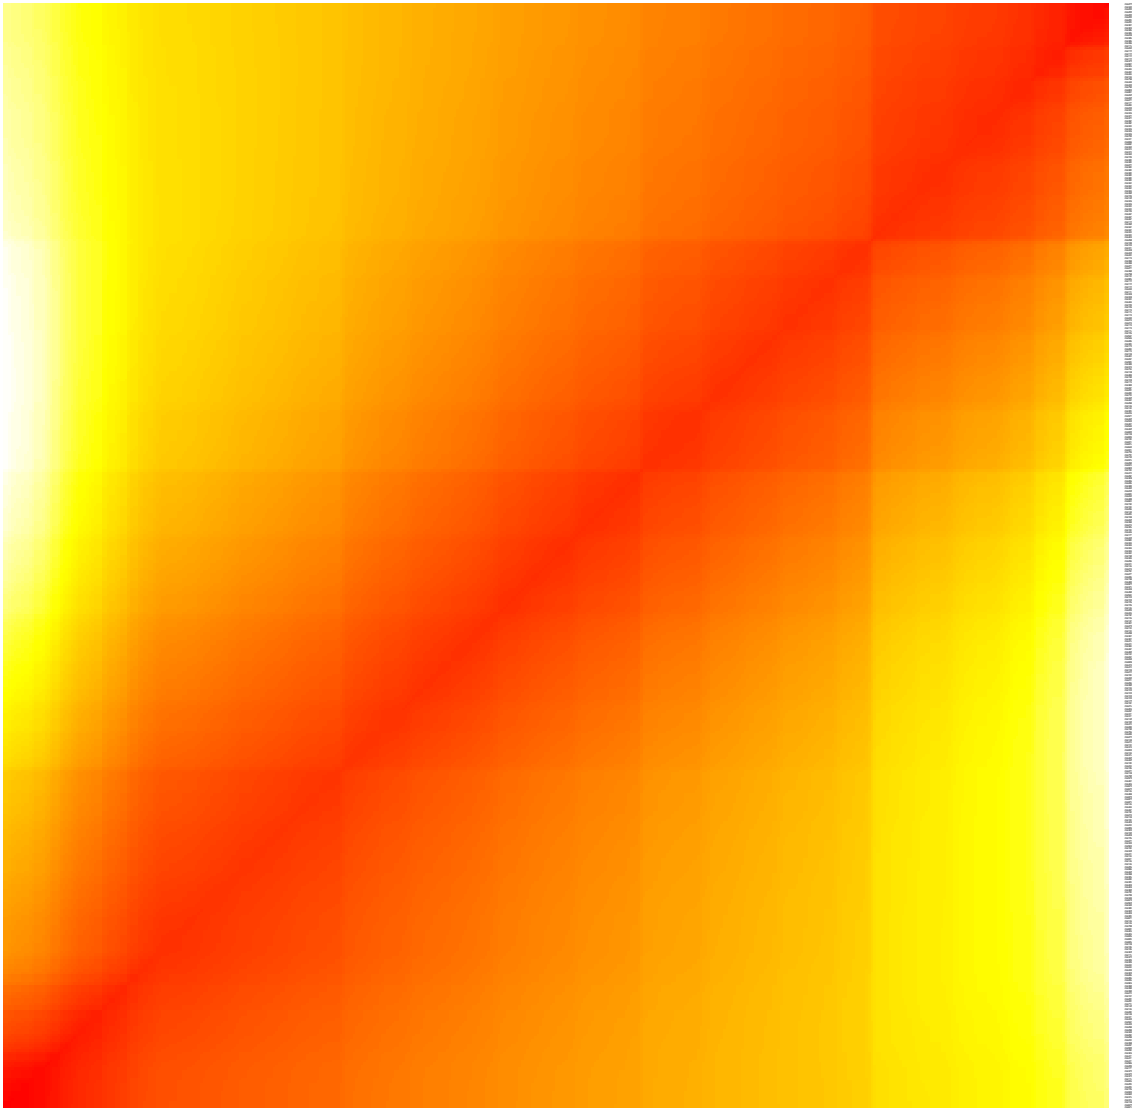

Supplement: s1 [file s1]

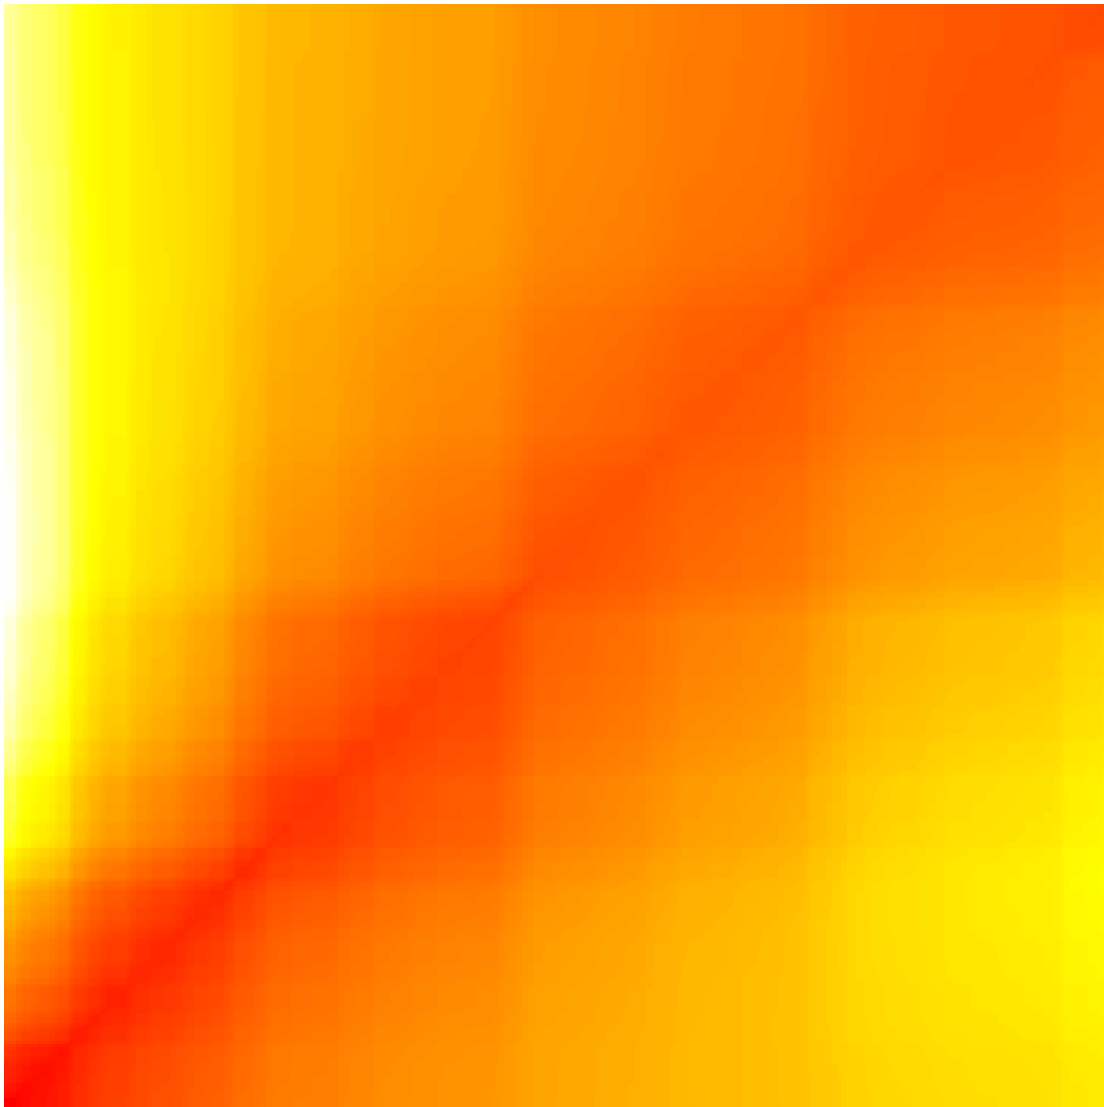

Supplement: s1 [file s1]

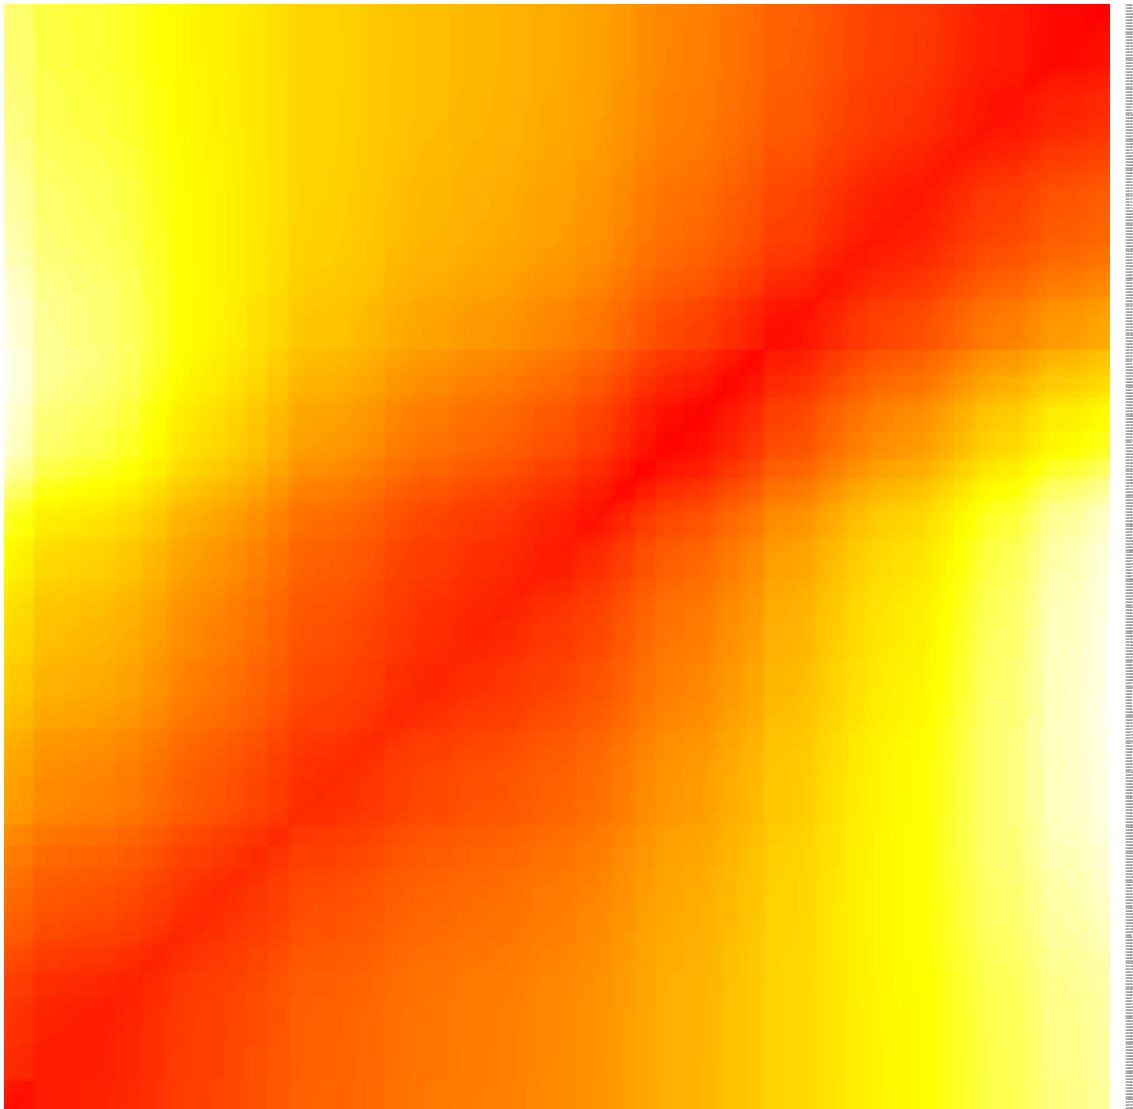

Supplement: s1 [file s1]

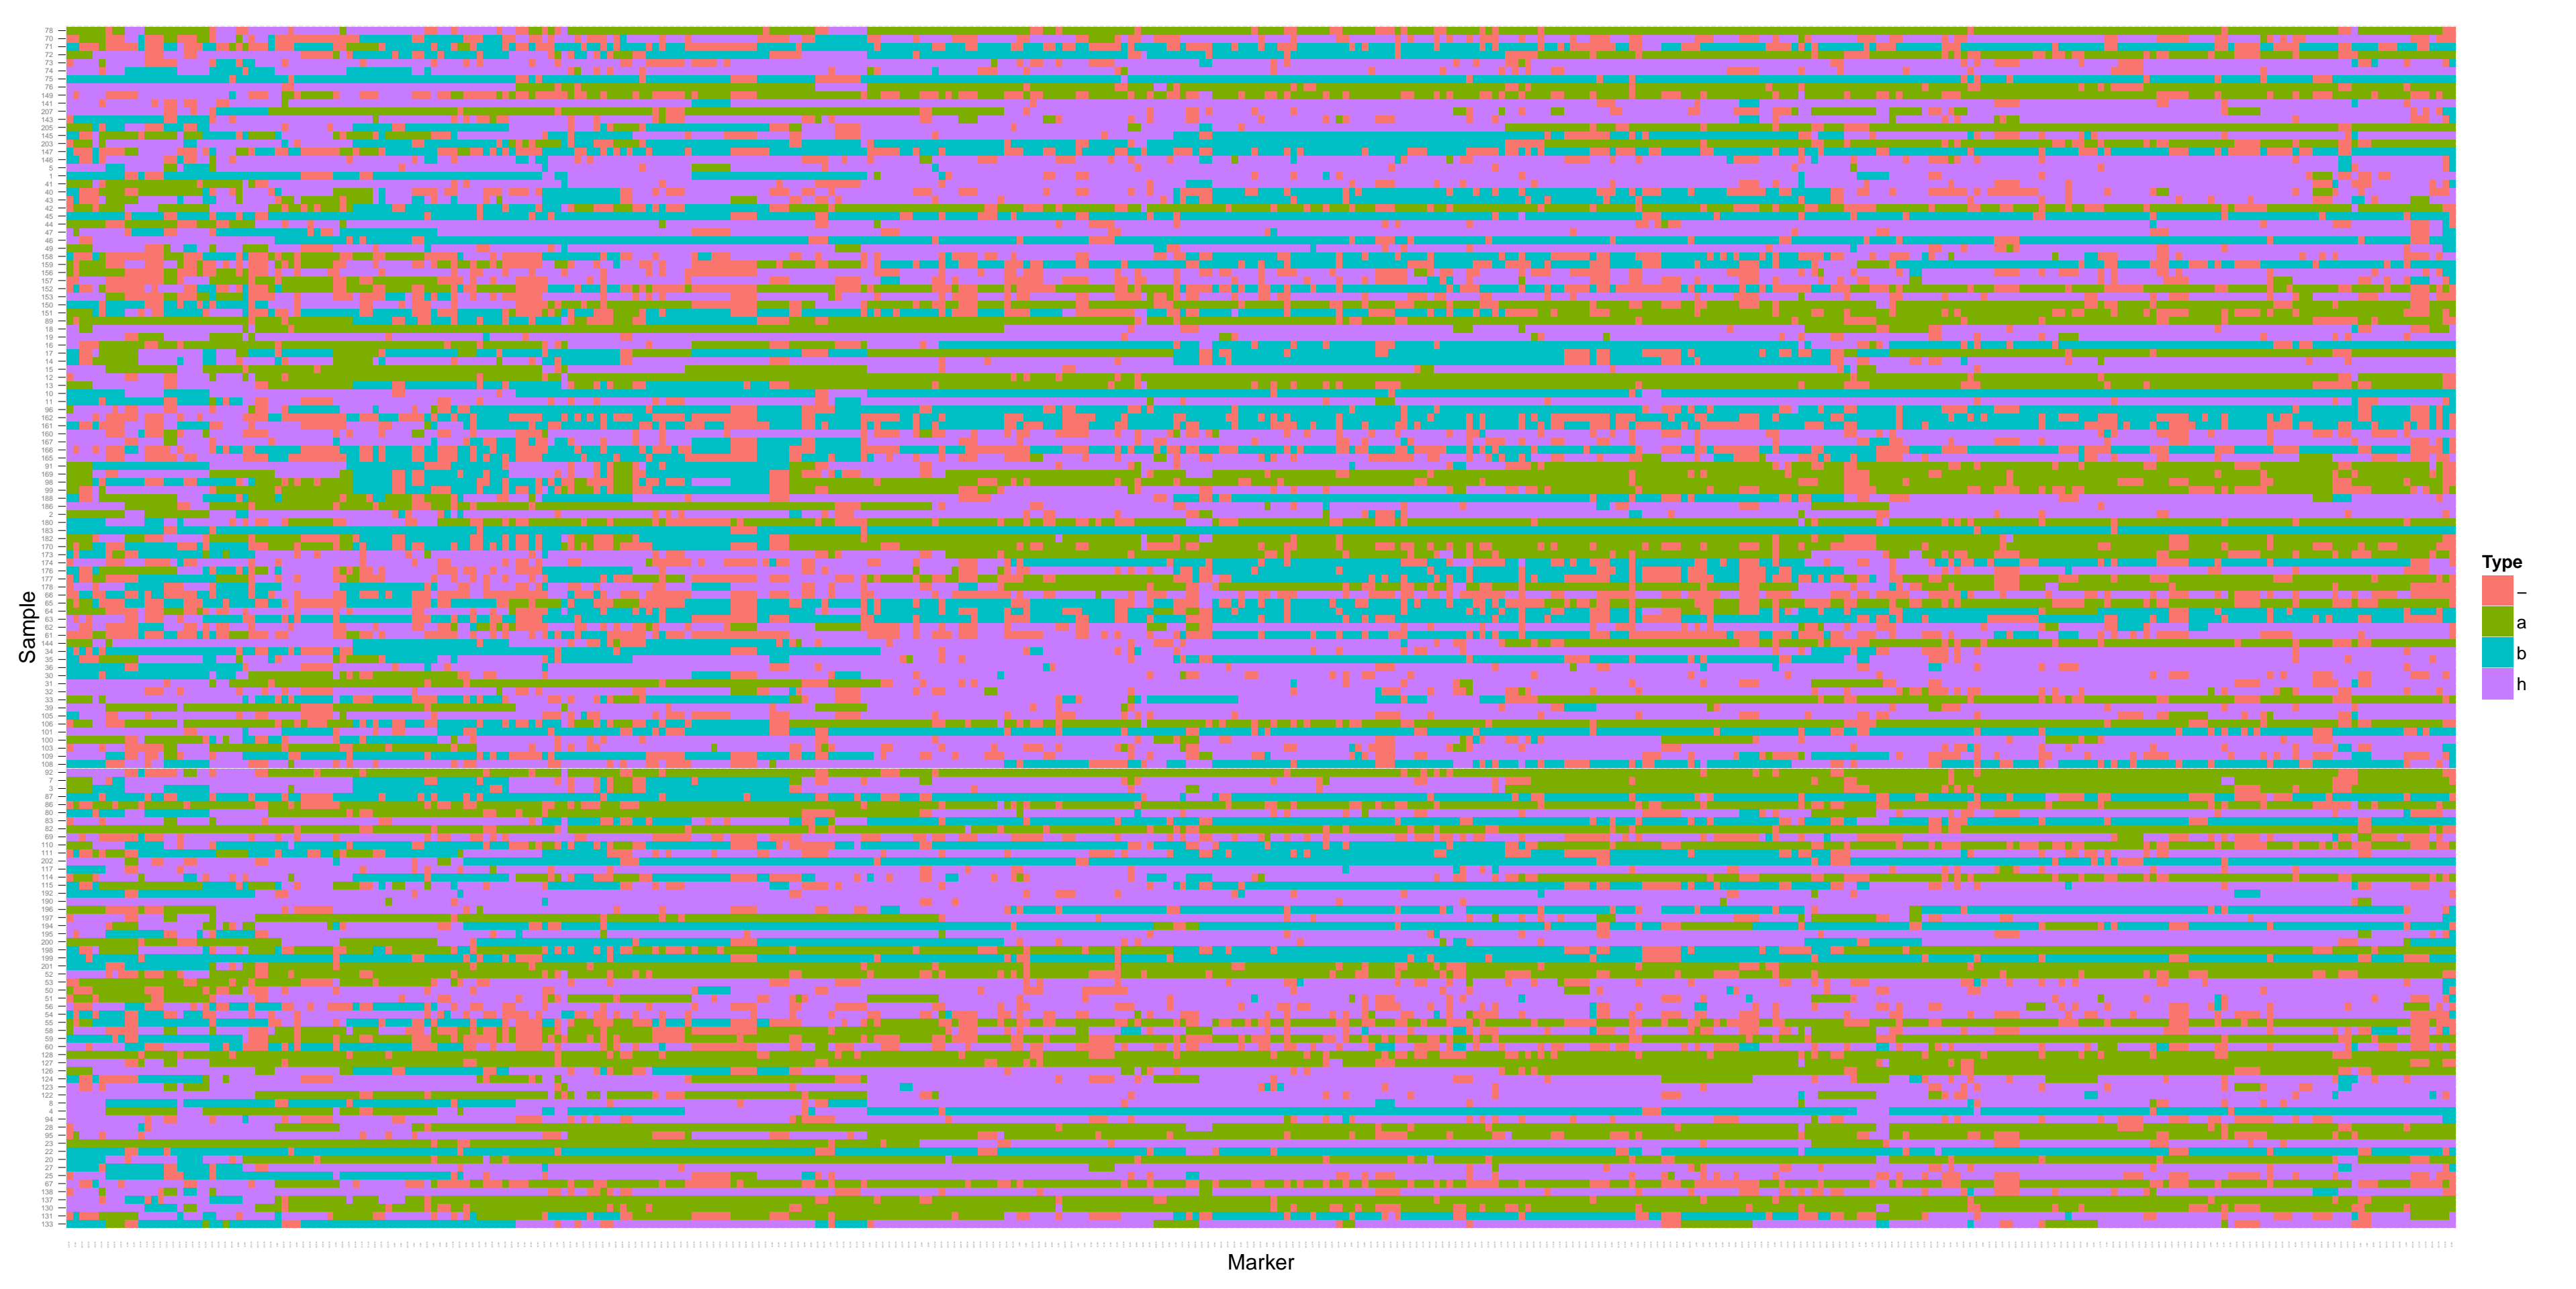

Supplement: s1 [file s1]

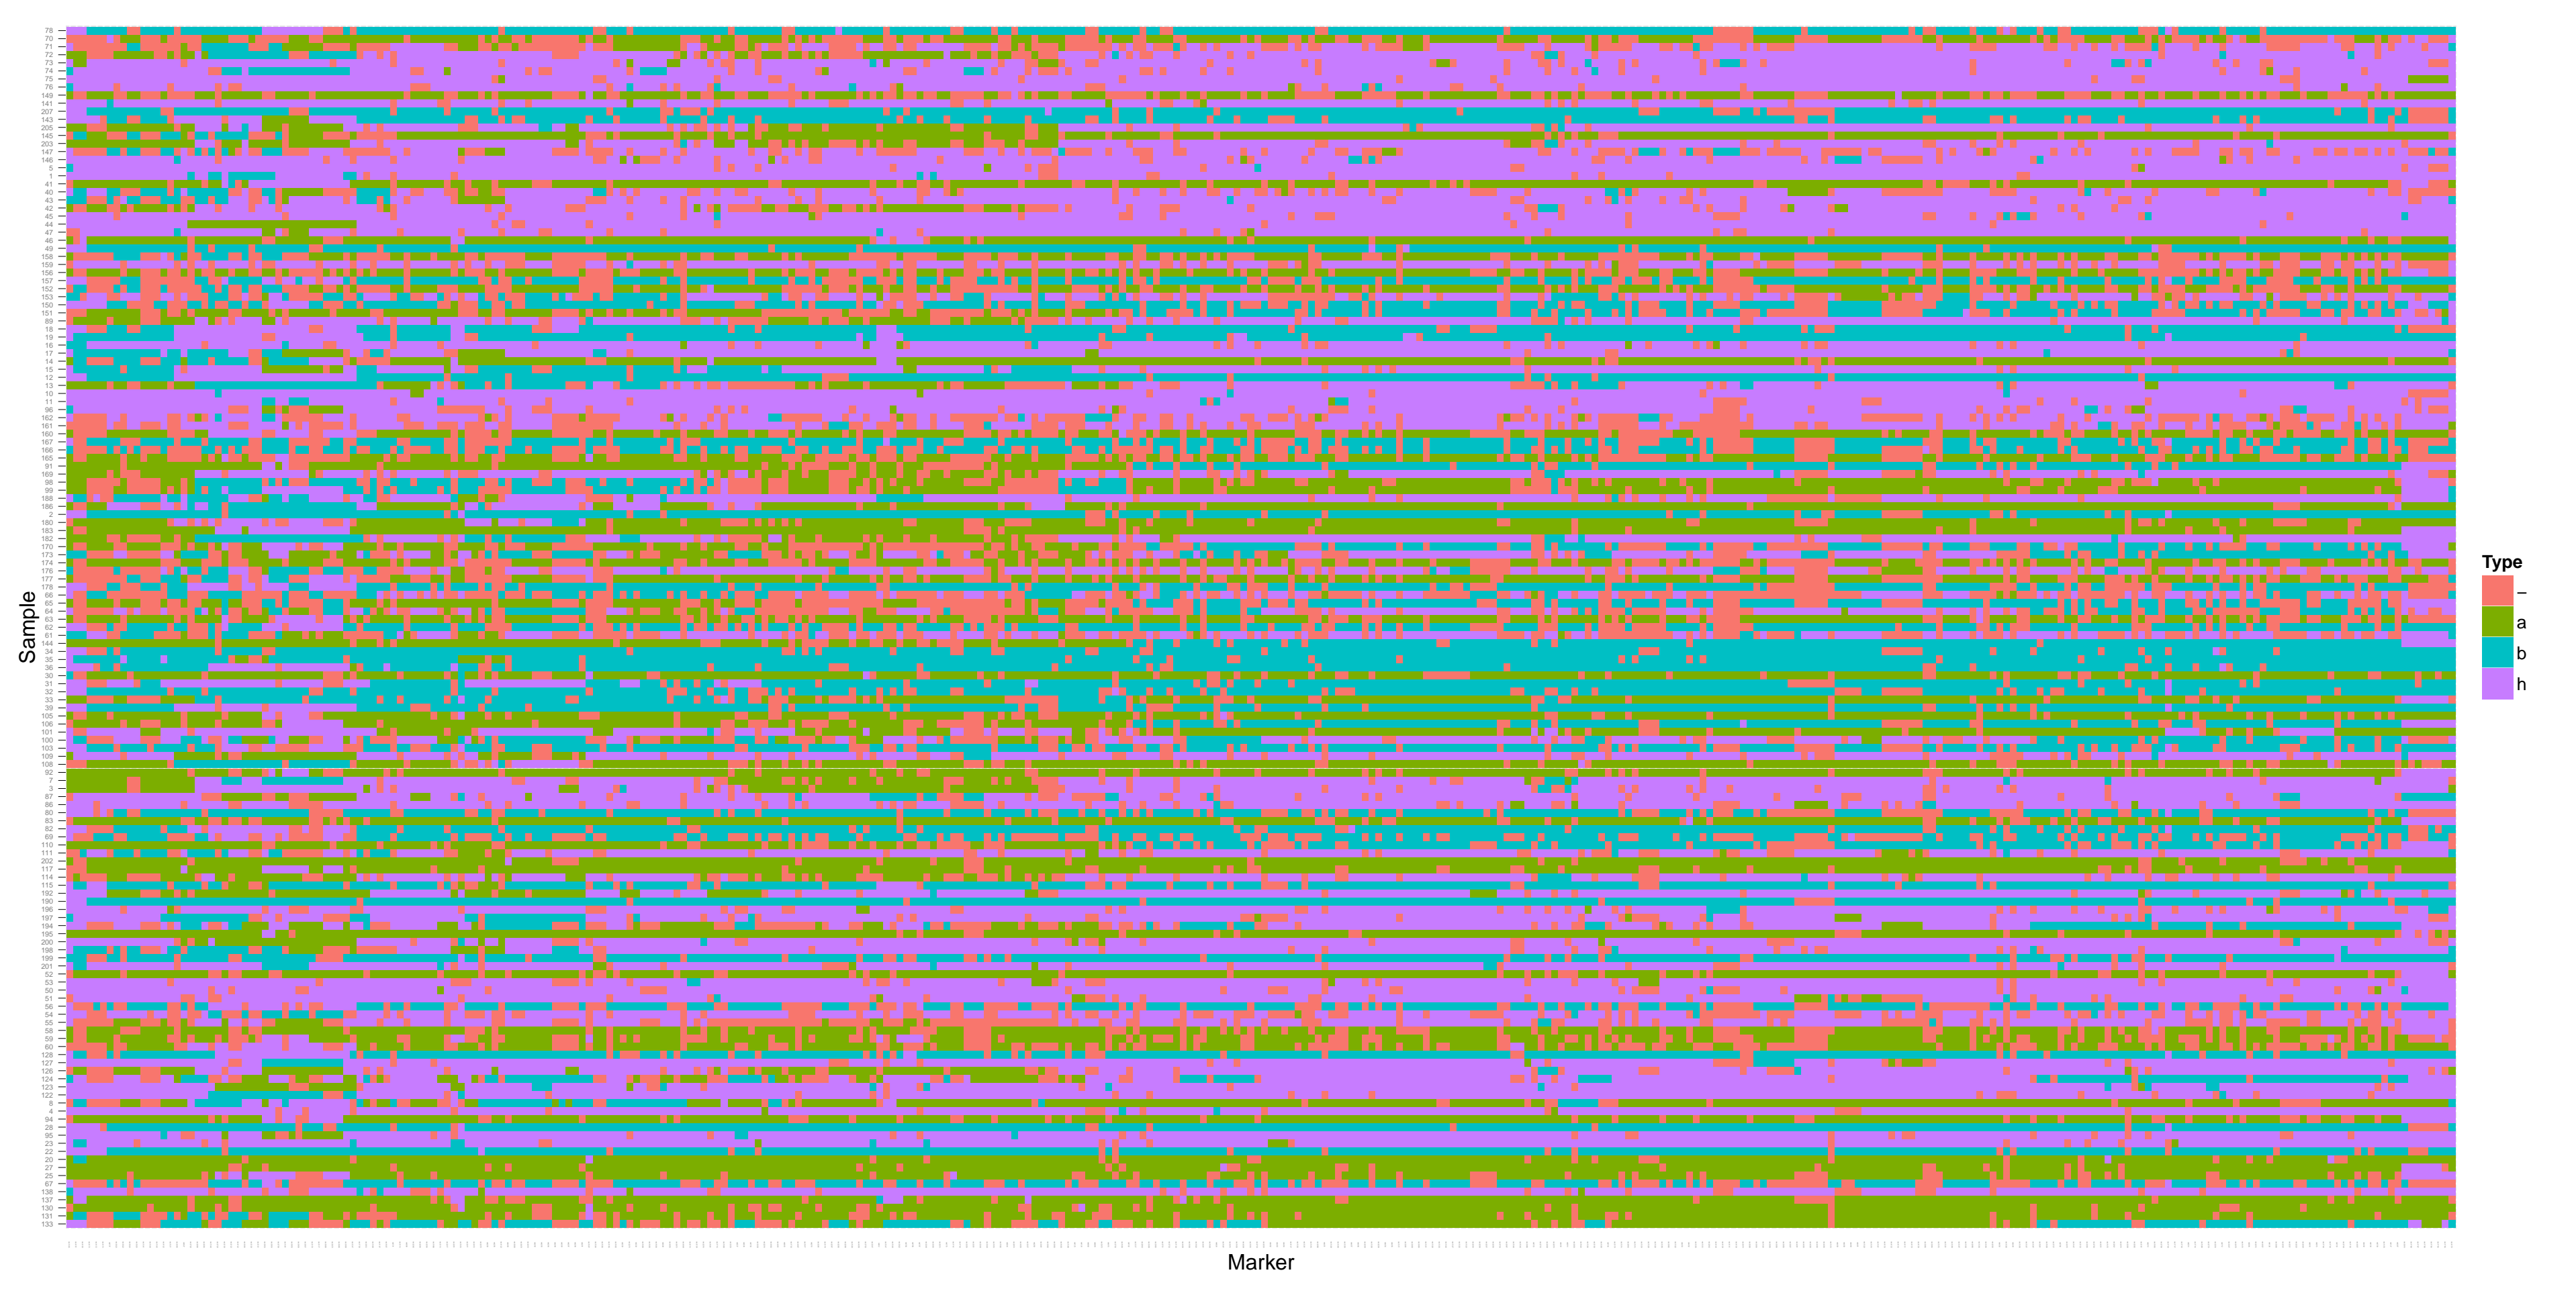

Supplement: s1 [file s1]
